# Supplementary material for: Modeling Cross-Disease Vulnerability in Africa: Predicting Malaria-Prone Countries and Accessing Susceptibility to Dengue, Chikungunya, and Measles Through Environmental and Social Determinants
Source: Research Square preprint supplement (doi:10.21203/rs.3.rs-6956759/v1), 2025-06-24
Supplement: Supplementary file 1 [file e42cd226a91cf920a6658bf6.xlsx]

## Sheet: Sheet1
Year	UN_Country_Code	Country	Malaria_Cases_per_1000	Malaria_Cases_LowerCI	Malaria_Cases_UpperCI	Rainfall_mm	Relative_Humidity_%	Temperature_Celsius	Population_Density_per_km2	Basic_Sanitation_Access_%	Mean_Years_Schooling	Health_Expenditure_per_Capita_USD	Urbanization_Rate	%Population_Under_15
2000	566	Nigeria	413.335	321.386	523.421	4.66	62.28	24.73	138.764	27.9946	4.469	17.1589	34.84	43.7374
2001	566	Nigeria	406.093	315.754	516.177	2.25	61.6	24.59	142.585	28.0339	4.592	17.9605	35.669	43.7412
2002	566	Nigeria	393.203	305.053	499.902	2.97	63.16	24.92	146.549	28.6863	4.637	17.5375	36.508	43.782
2003	566	Nigeria	393.807	307.576	498.915	2.35	61.25	25.44	150.645	29.3593	4.725	37.9144	37.356	43.8459
2004	566	Nigeria	402.384	319.445	498.39	1.52	56.84	26.04	154.877	30.0533	4.933	42.818	38.212	43.9137
2005	566	Nigeria	408.653	329.095	502.698	2.12	59.72	26.05	159.225	30.7689	5.142	52.2434	39.074	43.9921
2006	566	Nigeria	411.685	331.908	504.329	2.7	61.71	25.51	163.683	31.5068	5.351	63.6307	39.943	44.0888
2007	566	Nigeria	414.045	334.895	506.243	4.15	65.24	24.72	168.283	32.2677	5.559	66.9066	40.819	44.1837
2008	566	Nigeria	415.766	339.797	503.644	3	64.61	24.65	173.035	33.0521	5.768	77.4505	41.702	44.2749
2009	566	Nigeria	403.541	330.808	488.045	2.71	64.98	25.22	177.926	33.8603	5.804	65.7181	42.588	44.3602
2010	566	Nigeria	376.204	304.641	459.127	3.2	66.11	25.11	182.969	34.6931	5.84	73.0083	43.48	44.4191
2011	566	Nigeria	351.645	283.547	431.06	2.35	61.57	25.07	188.17	35.5499	5.875	80.2377	44.366	44.4509
2012	566	Nigeria	327.608	264.431	403.016	3.5	64	24.92	193.463	36.4309	5.911	87.8952	45.246	44.4633
2013	566	Nigeria	308.605	248.268	379.541	1.54	62.12	25.7	198.787	37.3361	5.947	97.2959	46.118	44.4528
2014	566	Nigeria	298.159	238.68	367.531	2.35	61.05	25.65	204.11	38.2655	6.296	102.399	46.982	44.4127
2015	566	Nigeria	294.111	235.308	364.725	1.98	55.91	25.85	209.352	39.2194	6.646	92.9121	47.838	44.3206
2016	566	Nigeria	295.056	233.507	366.436	3.79	64.31	25.25	214.592	40.1973	6.995	75.5233	48.683	44.1421
2017	566	Nigeria	299.074	237.078	372.372	2.5	60.21	25.57	219.874	41.1997	6.957	70.3181	49.519	43.8806
2018	566	Nigeria	300.685	236.545	379.191	2.47	61.4	25.67	225.017	42.2263	6.919	63.6024	50.344	43.5737
2019	566	Nigeria	301.908	233.347	387.662	3.02	62.11	25.71	230.009	43.2768	7.192	67.6254	51.157	43.2268
2020	566	Nigeria	312.651	224.64	425.552	3.17	63.2	25.07	234.962	44.3511	7.389	67.9138	51.958	42.8257
2021	566	Nigeria	306.462	222.668	417.038	4.11	62.63	25.28	239.939	45.4492	7.586	81.8732	52.746	42.3947
2022	566	Nigeria	305.304	220.023	411.343	4.68	66.24	24.28	245.013	46.5707	7.586	90.9219	53.521	41.9524
2000	180	DR Congo	461.271	371.724	563.911	4.72	78.09	25.03	22.2789	23.7477	5.142	17.5207	43.929	42.2681
2001	180	DR Congo	462.037	369.186	566.921	4.41	81.19	24.75	22.9958	23.2926	5.201	5.4341	44.601	41.8729
2002	180	DR Congo	465.889	370.474	577.412	4.97	84.43	24.48	23.7095	22.841	5.261	4.17579	45.275	41.4616
2003	180	DR Congo	471.415	377.209	583.701	4.18	78.33	25.36	24.4123	22.393	5.32	6.03258	45.951	41.0787
2004	180	DR Congo	473.814	378.441	583.426	4.71	76.4	25.46	25.1418	21.9486	5.379	7.83305	46.63	40.7206
2005	180	DR Congo	474.637	378.99	586.329	4.63	83.09	25.02	25.9261	21.5079	5.439	8.55066	47.308	40.3934
2006	180	DR Congo	470.579	377.601	578.26	3.6	71.62	26.07	26.7378	21.0891	5.479	10.3765	47.988	40.0929
2007	180	DR Congo	456.425	370.601	560.148	5.59	81.16	24.93	27.5591	20.6788	5.52	11.5629	48.669	39.7946
2008	180	DR Congo	435.928	353.987	530.298	5.4	89.77	23.71	28.4028	20.2769	5.561	15.3666	49.351	39.512
2009	180	DR Congo	408.754	331.754	498.388	5.56	87.8	24.1	29.2945	19.8836	5.601	12.7576	50.031	39.2739
2010	180	DR Congo	384.676	308.875	470.953	4.46	85.41	24.56	30.2433	19.4987	5.642	12.1423	50.713	39.1081
2011	180	DR Congo	361.568	289.582	446.801	5.77	83.58	24.46	31.2518	19.1225	5.748	11.8994	51.394	39.0093
2012	180	DR Congo	333.658	263.845	413.524	5.72	90.28	23.65	32.3127	18.7547	5.855	13.206	52.073	38.9369
2013	180	DR Congo	307.601	241.792	384.866	4.67	86.83	24.04	33.4308	18.3954	5.961	15.379	52.748	38.8606
2014	180	DR Congo	294.13	229.46	371.952	5.32	87	24.22	34.5838	18.0446	6.227	18.2228	53.419	38.7567
2015	180	DR Congo	298.758	231.212	379.469	4.07	84.78	24.54	35.7449	17.7023	6.493	18.5725	54.086	38.6068
2016	180	DR Congo	305.245	233.025	394.979	4.06	77.74	25.37	37.0333	17.3684	6.759	19.3114	54.749	38.4001
2017	180	DR Congo	317.119	241.026	407.909	4.31	79.61	25.3	38.4126	17.0428	6.904	18.1465	55.407	38.1356
2018	180	DR Congo	328.656	250.827	421.921	4.28	83.86	24.32	39.7202	16.7256	7.048	17.2908	56.06	37.8459
2019	180	DR Congo	330.001	250.501	426.924	5.02	87.65	24.16	40.9993	16.4167	7.127	19.2081	56.707	37.5513
2020	180	DR Congo	326.749	247.848	423.511	4.02	80.03	25	42.3414	16.1159	7.206	20.5593	57.349	37.2245
2021	180	DR Congo	320.998	242.469	419.047	4.64	83	24.45	43.7348	16.1462	7.206	21.5885	57.985	36.876
2022	180	DR Congo	309.607	231.159	408.501	4.2	84.74	24.29	45.1675	16.1745	7.206	24.3862	58.615	36.5291
2000	288	Ghana	427.701	342.718	527.632	2.3	64.56	27.54	86.3017	6.24573	6.874	10.4518	35.122	45.6679
2001	288	Ghana	417.318	340.323	505.998	2.54	64.26	27.76	88.6309	6.34853	6.937	12.1482	35.587	45.7017
2002	288	Ghana	395.962	320.524	483.736	2.78	65.22	27.63	91.1022	7.23252	7	14.3037	36.055	45.7484
2003	288	Ghana	369.661	295.573	459.327	3.25	69.47	27.44	93.5954	8.13639	7.063	18.8989	36.526	45.8196
2004	288	Ghana	344.265	269.86	431.218	3.46	73.12	26.9	96.1075	9.05995	7.125	23.499	37	45.8685
2005	288	Ghana	328.435	256.194	412.85	2.89	71.65	27.19	98.6615	10.0024	7.188	38.429	37.481	45.8773
2006	288	Ghana	324.878	255.471	407.303	2.84	70.04	27.39	101.26	10.9639	7.267	49.2424	37.971	45.902
2007	288	Ghana	324.308	253.19	410.933	3.19	71.32	26.83	103.904	11.9438	7.345	57.219	38.47	45.966
2008	288	Ghana	335.552	261.635	424.457	3.29	70.92	26.73	106.574	12.9418	7.424	63.3312	38.976	46.0393
2009	288	Ghana	354.747	284.653	437.316	3.36	73.31	27.1	109.267	13.9573	7.502	62.3464	39.491	46.0884
2010	288	Ghana	370.39	303.423	447.995	3.26	71.79	27.52	111.958	14.9904	7.581	80.5771	40.013	46.0619
2011	288	Ghana	375.252	309.178	453.16	3.03	73.18	26.81	114.684	16.0405	7.372	91.68	40.544	45.9856
2012	288	Ghana	366.108	300.584	443.534	3.55	72.5	26.71	117.493	17.1069	7.164	81.9495	41.082	45.9534
2013	288	Ghana	339.136	275.517	413.719	2.24	66.05	27.84	120.358	18.1893	6.955	105.348	41.627	45.956
2014	288	Ghana	308.446	246.689	379.999	2.85	67.93	27.89	123.238	19.2871	6.746	78.467	42.18	45.9689
2015	288	Ghana	270.846	212.054	341.837	2.95	68.52	27.32	126.114	20.4001	6.538	78.2164	42.74	45.9896
2016	288	Ghana	229.299	174.897	295.932	3.59	69.77	27.3	129.018	21.5279	6.329	64.864	43.307	45.9157
2017	288	Ghana	195.691	147.088	256.707	3.19	71.6	27.29	131.882	22.6701	6.121	54.106	43.88	45.8226
2018	288	Ghana	169.304	126.601	221.737	3.68	72.56	26.84	134.647	23.8263	6.224	53.3779	44.46	45.8675
2019	288	Ghana	163.402	121.872	213.68	3.87	74.12	27.07	137.382	24.9961	6.328	71.1496	45.046	45.9777
2020	288	Ghana	162.438	119.364	217.238	3.25	73.91	26.74	140.148	26.1792	6.432	97.3768	45.638	46.0526
2021	288	Ghana	159.749	105.673	230.286	3.88	72.84	27.43	142.918	27.3752	6.432	94.4039	46.235	46.0943
2022	288	Ghana	158.789	104.969	230.249	4.46	75.26	26.42	145.689	28.5839	6.432	82.3211	46.837	46.1121
2000	332	Haiti	9.66503	4.45012	11.2675	1.08	64.14	26.65	301.275	16.7495	3.736	30.3586	35.6	40.4455
2001	332	Haiti	9.66501	2.26958	4.61312	0.97	63.37	27.31	306.819	17.8375	3.844	27.3932	37.251	40.1185
2002	332	Haiti	9.66505	2.5093	5.11423	0.74	61.89	27.63	312.324	18.9377	3.952	22.3659	38.935	39.7417
2003	332	Haiti	9.66501	6.2002	16.3385	1.4	64.75	27.41	317.849	20.0497	4.059	18.6094	40.645	39.3275
2004	332	Haiti	9.66505	5.58051	15.5425	1.16	65.01	26.88	323.304	21.0517	4.167	24.0406	41.679	38.8788
2005	332	Haiti	9.66508	5.53952	15.5926	1.3	67.88	26.84	328.783	22.0475	4.274	25.2585	42.638	38.4052
2006	332	Haiti	9.8082	5.17738	13.7671	1.4	66.07	27.05	334.418	23.0519	4.364	29.1188	43.604	37.9357
2007	332	Haiti	8.70787	5.49049	15.6811	1.4	67.16	26.94	340.105	24.0645	4.454	37.5962	44.574	37.4837
2008	332	Haiti	10.4684	2.26711	4.61308	1.11	65.96	26.72	345.819	25.0864	4.543	40.446	45.551	37.0529
2009	332	Haiti	9.66499	2.64952	5.5941	1.14	65.3	26.92	351.581	26.1167	4.633	41.3989	46.528	36.6464
2010	332	Haiti	9.66508	2.03192	5.22831	1.61	69.41	26.66	355.707	27.1564	4.723	55.7352	47.509	36.2458
2011	332	Haiti	9.16221	5.53474	15.6726	1.83	68.55	26.35	359.757	28.2057	4.824	77.1221	48.492	35.8519
2012	332	Haiti	7.25764	5.76211	15.5429	1.82	68.12	26.6	365.376	29.2647	4.926	75.0855	49.477	35.4692
2013	332	Haiti	6.82308	5.51409	15.7364	0.72	63.98	27.27	370.913	30.3333	5.028	59.3828	50.46	35.0807
2014	332	Haiti	3.56005	5.57062	14.1352	0.94	64.58	27.4	376.387	31.4123	5.129	65.1086	51.444	34.696
2015	332	Haiti	3.4102	4.1579	10.6323	1.03	64.54	27.54	381.83	32.5017	5.231	68.5055	52.427	34.3138
2016	332	Haiti	3.79013	2.37032	4.80196	1.89	69.86	26.94	387.208	33.5994	5.307	60.0682	53.396	33.9455
2017	332	Haiti	3.41263	1.08042	2.2009	2.01	70.4	26.71	392.516	34.7045	5.382	53.8058	54.346	33.6027
2018	332	Haiti	1.62623	1.18052	2.39426	1.33	66.17	27.09	397.763	35.8174	5.458	62.301	55.278	33.268
2019	332	Haiti	1.77546	5.53569	15.7455	1.4	66.45	27.49	402.945	36.9385	5.534	49.33	56.192	32.9324
2020	332	Haiti	4.04644	5.49662	15.6547	2.03	68.24	27.29	407.977	37.1217	5.609	44.4272	57.088	32.601
2021	332	Haiti	2.20445	5.57189	15.6036	3.57	69.81	26.76	412.721	37.3009	5.609	57.6299	57.964	32.273
2022	332	Haiti	3.37914	1.3312	3.41904	0.99	64.83	27.52	417.402	37.4759	5.609	52.2995	58.82	31.9325
2000	404	Kenya	220.56	332.08	596.493	0.55	53.43	25.44	53.8407	28.0532	5.431	21.534	19.892	46.0777
2001	404	Kenya	248.285	46.8463	83.8795	1.3	56.85	25.3	55.556	28.3656	5.546	22.1149	20.239	45.6774
2002	404	Kenya	231.243	50.0715	92.0222	1.85	60.01	24.99	57.3318	28.7336	5.662	22.2877	20.591	45.2979
2003	404	Kenya	222.704	50.1303	95.3958	1.65	58.65	25.15	59.1282	29.1033	5.778	25.6401	20.948	44.9595
2004	404	Kenya	185.475	247.329	504.345	1.4	57.21	25.4	60.9928	29.4748	5.893	27.65	21.31	44.6396
2005	404	Kenya	139.154	344.884	575.668	0.92	54.35	25.67	62.8957	29.848	6.009	30.9943	21.675	44.3705
2006	404	Kenya	103.352	77.3795	136.177	1.95	59.64	25.26	64.8417	30.2231	6.085	40.304	22.045	44.1566
2007	404	Kenya	77.0686	444.763	677.371	1.02	57.55	25.53	66.8313	30.6001	6.162	49.4461	22.42	44.0025
2008	404	Kenya	64.8804	177.432	346.116	1.03	55.71	25.49	68.887	30.979	6.238	54.3568	22.8	43.8814
2009	404	Kenya	63.5552	374.733	620.404	1	55.17	25.89	70.9999	31.3599	6.314	55.4556	23.183	43.7623
2010	404	Kenya	65.9558	277.614	495.716	1.12	56.88	25.65	73.0902	31.7427	5.818	58.8165	23.571	43.6258
2011	404	Kenya	68.237	330.485	520.561	1.33	56.4	25.61	75.1282	32.1278	6.06	57.0229	23.969	43.4305
2012	404	Kenya	69.9371	304.066	448.224	1.23	55.59	25.55	77.1134	32.5151	6.302	64.4823	24.376	43.1709
2013	404	Kenya	71.1238	28.8239	257.9	1.14	57.32	25.51	79.0435	32.9048	6.544	67.5981	24.794	42.839
2014	404	Kenya	70.568	41.7268	77.3125	0.96	55.45	25.89	80.9141	33.2968	6.785	72.8459	25.221	42.4434
2015	404	Kenya	68.5691	431.259	656.394	1.31	55.37	25.91	82.7363	33.6914	7.027	70.9476	25.658	41.9989
2016	404	Kenya	64.6132	313.061	495.699	1.21	55.53	25.8	84.5832	34.0885	7.269	73.8877	26.105	41.5236
2017	404	Kenya	64.1084	331.097	497.702	1.08	53.98	26.1	86.4423	34.4882	7.511	66.4655	26.562	41.0136
2018	404	Kenya	61.5771	297.118	599.43	1.88	60.02	25.01	88.2157	34.8906	7.753	75.2768	27.03	40.4529
2019	404	Kenya	59.3292	449.967	690.2	1.75	57.62	26.06	89.9653	35.2958	7.995	85.6453	27.507	39.8689
2020	404	Kenya	62.0229	241.655	394.126	1.67	60.98	25.42	91.7478	35.7038	7.686	86.5922	27.995	39.2842
2021	404	Kenya	63.6509	333.262	509.65	1.69	56.74	25.58	93.508	36.1148	7.686	94.1062	28.493	38.6875
2022	404	Kenya	63.2548	34.1041	64.7801	1.27	57.57	25.28	95.3236	36.5287	7.686	90.4398	29.002	38.0712
2000	508	Mozambique	477.903	269.993	590.083	3.09	72.01	24.55	23.0546	10.2305	1.753	7.00878	29.098	45.0572
2001	508	Mozambique	491.932	49.4102	92.0853	3.37	71.62	24.73	23.5735	11.226	1.83	8.53719	29.277	45.1467
2002	508	Mozambique	495.353	42.1949	81.5255	2.58	69.75	24.68	24.1084	12.2573	1.907	10.0021	29.457	45.2152
2003	508	Mozambique	481.254	199.247	305.205	3.11	70.65	24.75	24.6604	13.3023	1.984	11.0366	29.637	45.2671
2004	508	Mozambique	454.177	314.92	607.822	3.41	72.96	24.47	25.2299	14.3614	2.061	14.1245	29.818	45.3114
2005	508	Mozambique	425.748	176.681	278.094	2.71	69.09	25.22	25.8203	15.4342	2.138	18.4072	29.999	45.3464
2006	508	Mozambique	408.316	287.666	450.519	2.55	69.33	24.86	26.4339	16.5212	2.188	18.0506	30.182	45.3722
2007	508	Mozambique	387.239	255.119	399.15	4.98	75.53	24.14	27.0704	17.6214	2.238	19.297	30.364	45.412
2008	508	Mozambique	374.145	406.17	599.823	3.08	70.6	24.56	27.7462	18.8302	2.288	24.4856	30.832	45.4955
2009	508	Mozambique	370.819	331.769	522.212	2.41	70.64	24.72	28.4745	20.0646	2.338	27.6895	31.328	45.6234
2010	508	Mozambique	373.642	67.3062	261.961	3.37	70.49	25.27	29.247	21.317	2.479	26.2606	31.83	45.7584
2011	508	Mozambique	370.679	306.116	453.994	2.7	70.14	24.65	30.0733	22.5868	2.62	30.4252	32.336	45.8377
2012	508	Mozambique	370.405	262.447	404.677	2.39	66.45	25.28	30.9492	23.8737	2.762	35.2467	32.846	45.8559
2013	508	Mozambique	368.958	39.2193	220.067	3.64	72.64	24.21	31.8569	25.1777	2.904	41.5031	33.36	45.841
2014	508	Mozambique	358.042	386.872	648.497	3.43	72.68	24.49	32.7939	26.4985	3.047	43.5026	33.878	45.7826
2015	508	Mozambique	349.808	393.587	600.677	1.89	65.81	25.63	33.7592	27.8361	3.189	40.3566	34.4	45.6924
2016	508	Mozambique	339.74	383.466	587.949	2.31	68.34	25.5	34.7632	29.1902	3.127	31.8536	34.926	45.5899
2017	508	Mozambique	328.877	33.7977	69.0157	4.38	75.21	24.25	35.8178	30.5603	3.064	36.7583	35.455	45.4749
2018	508	Mozambique	321.886	170.962	278.079	3.73	74.45	24.39	36.9016	31.9467	3.33	41.2921	35.988	45.3725
2019	508	Mozambique	310.227	210.323	476.525	2.94	71.06	25.14	38.0025	33.3503	3.595	41.0191	36.528	45.2865
2020	508	Mozambique	314.896	201.206	373.429	3.34	70.89	24.9	39.1461	34.7706	3.86	34.8755	37.074	45.1844
2021	508	Mozambique	315.882	69.5401	271.082	2.95	71.78	24.82	40.3212	36.0719	3.86	45.2279	37.628	45.0794
2022	508	Mozambique	316.743	478.824	738.65	4.16	74.73	24.48	41.5273	37.3798	3.86	49.473	38.187	44.9533
2000	686	Senegal	232.284	312.855	626.341	0.99	36.32	29.41	51.7751	36.8404	1.716	21.4157	40.32	43.946
2001	686	Senegal	178.265	48.0532	88.3801	0.72	33.34	29.91	53.046	37.8255	1.649	23.4589	40.464	43.7481
2002	686	Senegal	158.345	45.6098	82.3478	0.72	32.23	30.17	54.3615	38.8187	1.582	26.4622	40.607	43.4775
2003	686	Senegal	172.385	105.032	180.957	1.8	41.5	29.08	55.6857	39.8697	1.515	35.1449	40.898	43.225
2004	686	Senegal	132.916	359.639	550.399	1.47	39.82	29.35	57.0078	40.9633	1.447	41.9441	41.306	43.0763
2005	686	Senegal	135.84	456.708	699.893	1.8	43.79	29.09	58.357	42.0545	1.38	36.0061	41.714	42.9442
2006	686	Senegal	124.59	28.0506	49.801	1.51	39.97	29.07	59.7314	43.1437	1.54	38.2811	42.124	42.8317
2007	686	Senegal	100.325	253.041	427.099	1.62	39.23	28.87	61.1351	44.2306	1.709	40.6019	42.535	42.7468
2008	686	Senegal	52.9579	369.538	553.977	2.43	45.68	28.5	62.5822	45.3148	1.879	49.0539	42.947	42.6917
2009	686	Senegal	33.2687	321.509	530.949	2.3	46.74	28.15	64.0803	46.396	2.048	50.2744	43.359	42.6695
2010	686	Senegal	60.904	400.656	598.813	2.11	46.74	28.96	65.6283	47.4746	2.217	51.3881	43.773	42.673
2011	686	Senegal	48.621	303.219	454.061	1.51	40.16	29.03	67.3085	48.5501	2.386	57.9311	44.188	42.6849
2012	686	Senegal	53.3577	242.872	399.119	1.78	43.81	28.72	69.1347	49.6222	2.584	56.6146	44.603	42.7005
2013	686	Senegal	58.3584	33.2639	76.6041	1.7	41.91	29.22	71.2141	50.6908	2.782	60.5158	45.019	42.6807
2014	686	Senegal	38.1367	36.7765	70.1055	1.49	40.93	29.18	73.506	51.7559	2.657	61.4061	45.436	42.567
2015	686	Senegal	70.4177	271.116	576.407	1.29	41	29.05	75.7977	52.8194	2.532	53.323	45.862	42.3643
2016	686	Senegal	46.3774	394.695	578.193	0.97	39.27	29.74	78.0892	53.8807	2.892	53.9005	46.296	42.0963
2017	686	Senegal	53.1536	297.117	630.453	1.34	39.52	29.57	80.3771	54.9399	2.831	56.4919	46.74	41.7561
2018	686	Senegal	67.2658	41.2873	92.9265	0.99	38.35	29.35	82.6598	55.996	2.998	64.3747	47.192	41.3389
2019	686	Senegal	42.0118	301.44	449.013	1.17	37.48	29.49	84.937	57.049	2.841	64.3367	47.653	40.8595
2020	686	Senegal	43.9166	187.664	446.775	1.73	44.54	29.15	87.2031	58.0982	2.887	75.1652	48.122	40.3311
2021	686	Senegal	50.9768	28.3715	56.9872	1.9	45.69	29.3	89.4451	59.1434	2.887	71.1216	48.6	39.7623
2022	686	Senegal	48.0187	42.712	80.9477	1.95	46.3	28.79	91.6798	60.1839	2.887	63.7339	49.086	39.1603
2000	694	Sierra Leone	445.346	277.371	584.298	4.87	83.03	25.2	61.2858	7.69469	2.77	17.8082	35.626	43.8413
2001	694	Sierra Leone	448.129	48.252	85.5524	2.08	74.34	26.55	65.0141	7.92617	2.861	19.4427	35.867	43.8853
2002	694	Sierra Leone	444.653	44.2057	83.4251	1.35	66.23	28	68.8755	8.15826	2.953	23.7095	36.109	43.9115
2003	694	Sierra Leone	426.732	184.646	286.643	1.5	66.68	28.05	71.733	8.39095	3.044	22.6285	36.352	43.9135
2004	694	Sierra Leone	413.99	57.4469	101.171	2.94	73.87	27.12	74.1995	8.94955	3.136	23.4541	36.596	43.8804
2005	694	Sierra Leone	407.446	241.678	513.162	2.45	76.08	26.78	76.2221	9.53865	3.165	27.1346	36.919	43.8151
2006	694	Sierra Leone	402.662	306.388	464.488	2.35	74.85	26.95	77.9228	10.1567	3.193	30.2459	37.303	43.7308
2007	694	Sierra Leone	408.503	419.352	663.274	2.19	71.71	27.27	79.653	10.7956	3.222	31.9999	37.689	43.6269
2008	694	Sierra Leone	429.353	292.056	434.223	6.05	75.14	26.71	81.667	11.4555	3.251	37.4547	38.077	43.5022
2009	694	Sierra Leone	450.631	239.242	411.235	9.03	75.3	26.51	83.8965	12.1362	3.28	39.2441	38.466	43.3604
2010	694	Sierra Leone	449.959	249.723	544.481	6.42	78.89	26.56	86.2111	12.8377	3.308	37.812	38.856	43.2028
2011	694	Sierra Leone	442.841	370.631	621.277	2.56	75.05	26.73	88.4906	13.5602	3.337	49.6035	39.248	43.0185
2012	694	Sierra Leone	429.712	300.119	449.173	8.54	75.86	26.35	90.7603	14.3036	3.366	51.8996	39.642	42.7966
2013	694	Sierra Leone	413.196	37.074	72.1758	7.48	79.97	25.9	93.0182	15.0676	3.395	84.9377	40.036	42.526
2014	694	Sierra Leone	397.661	385.511	640.533	7.1	79.94	25.99	95.2672	15.8526	3.424	143.606	40.432	42.2026
2015	694	Sierra Leone	384.088	410.949	651.477	8.16	77.49	26.07	97.5015	16.6583	3.452	118.66	40.829	41.8333
2016	694	Sierra Leone	378.858	305.543	477.739	10.43	77.14	26.45	99.8244	17.4849	3.481	84.6362	41.228	41.436
2017	694	Sierra Leone	363.914	39.8445	63.7418	8.48	79.38	26.43	102.235	18.3339	3.51	47.3774	41.636	41.0243
2018	694	Sierra Leone	353.882	315.949	467.071	8.43	78.13	26.16	104.663	19.2055	3.507	44.8273	42.055	40.6049
2019	694	Sierra Leone	336.398	226.752	485.74	7.69	76.94	26.67	107.121	20.0997	3.503	48.1362	42.484	40.2014
2020	694	Sierra Leone	324.482	194.905	407.083	5.66	78.86	26.39	109.623	21.0167	3.519	47.8862	42.923	39.8111
2021	694	Sierra Leone	314.302	47.6587	95.6887	12.23	78.98	26.75	112.145	21.9565	3.519	44.9005	43.372	39.4053
2022	694	Sierra Leone	308.139	34.2135	54.53	5.32	77.79	26.26	114.669	22.9192	3.519	39.3167	43.831	38.9762
2000	800	Uganda	487.226	275.849	590.323	2.62	61.67	24.75	120.115	16.3795	3.943	16.4259	14.786	50.0599
2001	800	Uganda	507.974	50.1076	98.0826	3.27	66.6	24.23	123.846	16.5976	4.02	15.9957	15.201	50.1278
2002	800	Uganda	500.153	337.966	590.094	2.61	64.12	24.8	127.786	16.8152	4.097	15.7443	15.626	50.1275
2003	800	Uganda	484.125	47.4995	86.5603	2.93	63.03	24.97	131.886	17.0322	4.272	14.2336	16.061	50.0835
2004	800	Uganda	449.825	342.958	532.595	2.86	64.66	24.72	135.902	17.2487	4.448	18.6071	16.507	50.0818
2005	800	Uganda	433.645	335.691	554.227	2.09	60.77	25.29	139.949	17.4643	4.624	25.8682	16.96	50.0759
2006	800	Uganda	421.31	159.281	330.128	2.56	62.08	25.17	144.107	17.6794	4.799	31.6031	17.425	50.0389
2007	800	Uganda	415.414	449.051	680.239	2.85	65.47	24.58	148.408	17.8939	4.975	36.1013	17.899	49.9619
2008	800	Uganda	417.961	177.838	422.133	2.63	64.56	24.39	152.843	18.1077	5.151	40.0431	18.384	49.8359
2009	800	Uganda	423.051	327.226	505.116	2.67	63.39	24.98	157.405	18.3208	5.522	44.3671	18.878	49.673
2010	800	Uganda	409.437	250.083	545.247	3.28	67.14	24.43	161.534	18.5333	5.893	51.8857	19.383	49.4823
2011	800	Uganda	394.68	174.907	416.144	3.35	66.05	24.34	166.34	18.7451	5.509	55.2077	19.898	49.2877
2012	800	Uganda	376.556	275.855	415.809	3.18	66.7	24.23	171.242	18.9562	5.125	55.0392	20.424	49.076
2013	800	Uganda	332.344	40.1541	244.843	2.92	66.79	24.3	176.227	19.1663	5.316	52.9064	20.958	48.8278
2014	800	Uganda	294.282	337.883	521.763	3.2	66.7	24.33	181.506	19.3758	5.508	50.9578	21.504	48.4979
2015	800	Uganda	253.515	235.875	511.072	3.32	67.19	24.38	187.171	19.5846	5.699	40.0984	22.06	48.0729
2016	800	Uganda	283.137	343.717	522.755	2.4	66.06	24.73	193.493	19.7922	5.89	39.0813	22.624	47.5229
2017	800	Uganda	294.903	298.476	587.42	2.6	64.4	24.87	200.366	19.9988	5.974	31.4382	23.196	46.9022
2018	800	Uganda	262.692	143.599	236.604	2.48	65.33	24.44	207.29	20.2039	6.06	32.9516	23.774	46.3283
2019	800	Uganda	262.692	301.851	450.608	3.9	68.59	24.51	214.441	20.4081	6.147	33.3656	24.361	45.7633
2020	800	Uganda	283.818	172.771	414.565	3.65	73.85	23.43	221.709	20.6108	6.235	44.7338	24.954	45.2238
2021	800	Uganda	262.878	261.377	470.253	1.78	64.19	24.8	228.959	20.8121	6.235	51.0348	25.553	44.7326
2022	800	Uganda	267.751	477.361	743.514	2.59	64.54	24.74	235.95	21.0121	6.235	44.145	26.159	44.3071
2000	854	Burkina Faso	599.317	339.58	567.693	1.94	44.74	27.5	43.5875	10.1879	1.47	7.34346	17.844	46.5509
2001	854	Burkina Faso	599.748	50.0736	96.3851	1.71	42.31	27.68	44.9379	10.5063	1.444	7.49485	18.54	46.2995
2002	854	Burkina Faso	594.749	46.8089	86.1812	1.36	38.66	28.56	46.3483	11.3937	1.418	8.48715	19.258	46.0448
2003	854	Burkina Faso	584.464	41.631	93.2736	2.34	48.64	27.75	47.8163	12.2687	1.392	11.3897	19.996	45.8174
2004	854	Burkina Faso	561.278	239.865	509.113	1.5	44.28	28.18	49.3441	13.1317	1.367	17.0296	20.757	45.6239
2005	854	Burkina Faso	530.652	296.597	471.17	2.11	46.41	28.26	50.9215	13.9806	1.343	17.4308	21.537	45.4655
2006	854	Burkina Faso	513.212	188.714	468.372	1.86	45.46	27.85	52.5355	14.8159	1.319	20.564	22.339	45.3759
2007	854	Burkina Faso	521.352	285.546	425.659	2.11	48.08	27.44	54.1532	15.5708	0.977	26.9372	22.996	45.3719
2008	854	Burkina Faso	551.824	174.87	411.733	2.06	46.53	27.09	55.7679	16.2597	1.021	28.7903	23.534	45.4345
2009	854	Burkina Faso	570.776	322.225	541.626	2.17	50.29	27.67	57.4198	16.9336	1.065	30.5693	24.079	45.5152
2010	854	Burkina Faso	570.473	49.6284	253.083	2.7	54.23	27.28	59.1246	17.5932	1.11	32.7452	24.633	45.5855
2011	854	Burkina Faso	556.662	311.588	490.932	2.23	53.48	26.9	60.8988	18.238	1.154	33.7041	25.196	45.6295
2012	854	Burkina Faso	535.215	239.602	408.97	2.84	54.79	26.78	62.7642	18.8676	1.198	33.6672	25.767	45.6318
2013	854	Burkina Faso	488.774	22.6254	45.3596	2.61	53.77	27	64.6762	19.4816	1.242	42.268	26.346	45.6185
2014	854	Burkina Faso	447.606	31.7504	62.7256	2.09	50.33	27.57	66.6281	20.0802	1.286	38.2452	26.934	45.5778
2015	854	Burkina Faso	419.282	468.913	719.325	3.06	51	26.84	68.6312	20.6627	1.445	32.3375	27.53	45.4829
2016	854	Burkina Faso	374.321	198.008	481.569	2.68	53.63	27.03	70.6683	21.229	1.603	39.5233	28.134	45.3294
2017	854	Burkina Faso	357.614	46.8111	90.2202	2.7	50.8	27.13	72.7135	21.7779	1.761	42.9448	28.743	45.1225
2018	854	Burkina Faso	357.026	476.765	727.964	2.98	54.02	27.08	74.7013	22.3096	1.92	38.9159	29.358	44.8545
2019	854	Burkina Faso	356.663	459.113	698.668	2.79	54.64	26.79	76.6153	22.8241	2.102	41.0505	29.98	44.5028
2020	854	Burkina Faso	377.402	219.185	388.186	3.09	55.15	26.85	78.504	23.3207	2.319	54.2878	30.607	44.0467
2021	854	Burkina Faso	376.772	28.8365	185.5	2.21	51.93	27.48	80.392	24.0411	2.319	57.224	31.24	43.5166
2022	854	Burkina Faso	353.678	403.197	643.461	3.28	54.68	26.63	82.2699	24.7565	2.319	56.7571	31.877	42.9683
2000	24	Angola	109.412	91.2772	128.806	2.5	56.19	22.9	12.9902	27.5575	3.426	13.16	50.087	45.6185
2001	24	Angola	200.706	156.656	251.411	3.26	64.14	21.82	13.4332	28.9892	3.465	29.261	51.274	45.5252
2002	24	Angola	219.166	128.562	346.328	2.15	55.2	23.15	13.8989	30.4225	3.505	29.3708	52.461	45.4314
2003	24	Angola	235.024	103.871	365.142	1.57	52.3	23.63	14.393	31.8561	3.546	35.2207	53.645	45.3374
2004	24	Angola	407.46	324.548	506.743	2.08	53	23.24	14.9197	33.2904	3.586	50.2331	54.827	45.2521
2005	24	Angola	426.199	339.186	526.941	1.67	51.05	24.01	15.4738	34.7226	3.627	54.6614	56	45.1862
2006	24	Angola	421.708	333.683	524.442	1.85	51.62	23.64	16.0546	35.9913	3.667	70.2819	56.764	45.1406
2007	24	Angola	230.123	171.641	299.419	4.44	59.73	22.41	16.6668	37.2593	3.708	93.427	57.524	45.1123
2008	24	Angola	420.503	337.96	513.304	2.39	61.68	21.99	17.3086	38.5275	3.748	136.341	58.282	45.1087
2009	24	Angola	235.802	134.974	385.486	3.65	59.83	22.56	17.9793	39.7943	3.788	120.529	59.034	45.1245
2010	24	Angola	246.28	142.879	396.131	3.33	67.68	21.57	18.6852	41.0608	3.829	96.952	59.783	45.1402
2011	24	Angola	318.898	223.2	439.812	3.16	60.39	22.19	19.426	42.3267	3.869	122.119	60.528	45.1496
2012	24	Angola	353.56	249.069	502.676	3.54	63.55	21.78	20.1952	43.5915	3.91	121.848	61.268	45.1631
2013	24	Angola	241.667	184.837	311.104	3.37	63.96	21.91	20.9879	44.8548	3.95	142.785	62.002	45.184
2014	24	Angola	165.799	129.588	208.88	2.34	61.2	22.42	21.7861	46.117	3.991	130.586	62.731	45.2259
2015	24	Angola	171.807	74.5966	448.762	2.13	54.52	23.62	22.5859	47.3745	5.316	107.529	63.446	45.2743
2016	24	Angola	430.846	331.317	549.059	2.04	54.22	23.73	23.4083	48.6279	5.417	94.0148	64.149	45.2826
2017	24	Angola	383.451	269.529	528.899	2.46	52.51	23.84	24.2519	49.877	5.521	112.754	64.839	45.2508
2018	24	Angola	384.222	270.753	545.423	3.24	67.81	21.75	25.104	51.1207	5.627	84.031	65.514	45.1972
2019	24	Angola	242.427	147.552	377.983	1.89	55.49	23.44	25.9691	51.3936	5.735	64.614	66.177	45.1128
2020	24	Angola	36.9305	27.4574	46.7896	4.04	66.83	21.83	26.8317	51.6603	5.844	55.9392	66.825	45.0196
2021	24	Angola	219.467	129.163	350.247	3.07	60.08	22.55	27.6991	51.9217	5.844	67.0466	67.46	44.9093
2022	24	Angola	211.404	122.744	337.794	2.53	58.67	22.79	28.5835	52.1773	5.844	101.256	68.081	44.7579
2000	204	Benin	123.172	45.4725	206.661	2.29	59.98	26.59	64.0442	8.60567	2.29	14.4237	38.333	45.4384
2001	204	Benin	179.138	123.659	251.387	2.18	59.53	26.8	66.0305	9.00425	2.374	16.2698	38.65	45.2627
2002	204	Benin	264.187	200.609	343.355	2.79	62.41	26.5	68.0687	9.42523	2.459	16.9179	39.036	45.0848
2003	204	Benin	36.9642	20.3449	55.4802	3.59	67.37	26.32	70.1762	9.87677	2.471	21.0696	39.536	44.9137
2004	204	Benin	202.237	151.894	254.477	2.91	70	26.02	72.3581	10.3401	2.484	24.5267	40.039	44.7601
2005	204	Benin	439.576	351.627	547.888	2.31	65.14	26.97	74.7264	10.8147	2.497	25.1249	40.543	44.5713
2006	204	Benin	262.432	88.7969	491.061	2.76	65.07	26.78	77.0951	11.3007	2.51	26.6026	41.049	44.4384
2007	204	Benin	214.992	54.934	435.641	3.61	69.86	25.66	79.4073	11.7983	2.522	26.7968	41.558	44.3715
2008	204	Benin	416.458	278.427	605.216	2.9	68.67	25.69	81.8417	12.3071	2.535	28.1249	42.069	44.2605
2009	204	Benin	401.715	309.644	511.845	3.31	72.29	26.23	84.3333	12.8267	2.548	29.5856	42.58	44.0859
2010	204	Benin	260.635	190.097	349.916	3.53	72	26.18	86.8879	13.3574	2.561	29.2936	43.093	43.8989
2011	204	Benin	214.841	170.727	266.943	3.07	72.11	25.61	89.5142	13.8991	2.574	31.7515	43.608	43.7627
2012	204	Benin	204.06	102.927	375.928	3.57	71.97	25.7	92.2105	14.4517	2.586	32.9562	44.125	43.6548
2013	204	Benin	206.366	132.395	305.758	2.57	69.69	26.45	94.9701	15.0147	2.599	33.5343	44.642	43.5669
2014	204	Benin	180.411	118.907	263.242	3.07	66.94	26.62	97.8184	15.5895	2.612	32.4118	45.166	43.4827
2015	204	Benin	179.35	118.348	263.866	2.28	62.52	26.85	100.751	16.1754	2.625	27.3473	45.695	43.3979
2016	204	Benin	210.122	157.489	275.149	2.91	64.3	26.97	103.741	16.7725	2.637	28.2494	46.229	43.3119
2017	204	Benin	380.813	294.221	485.553	3.18	65.76	26.67	106.774	17.3807	2.65	28.1482	46.768	43.208
2018	204	Benin	383.603	274.824	528.324	2.91	68.83	26.11	109.82	17.9998	2.842	33.2163	47.312	43.0654
2019	204	Benin	190.111	148.164	239.7	3.12	68.66	26.5	112.866	18.6299	3.034	28.372	47.861	42.877
2020	204	Benin	153.992	99.5723	216.604	3.24	68.62	26.22	115.911	19.2707	3.137	32.5536	48.415	42.6532
2021	204	Benin	226.907	170.933	293.291	3.06	67.04	26.47	118.955	19.3816	3.137	34.0383	48.972	42.3989
2022	204	Benin	203.732	121.338	321.844	3.61	69.43	25.68	122.025	19.4935	3.137	33.8822	49.534	42.1206
2000	120	Cameroon	140.466	69.5653	222.657	5.07	65.55	22.56	31.5471	38.2963	2.981	30.4381	45.542	44.9056
2001	120	Cameroon	163.768	129.492	207.118	3.66	67.25	22.28	32.3866	38.3301	3.059	29.823	46.139	44.7132
2002	120	Cameroon	367.753	294.453	455.956	3.94	66.43	22.83	33.2668	38.3674	3.137	31.7958	46.738	44.5041
2003	120	Cameroon	234.102	153.827	344.294	3.13	64.69	23.22	34.1866	38.5908	3.214	38.5639	47.338	44.3194
2004	120	Cameroon	104.74	72.9031	137.86	3.04	61.28	23.73	35.1389	38.8161	3.292	42.2528	47.94	44.1794
2005	120	Cameroon	409.754	330.041	501.87	3.13	62.09	23.96	36.1207	39.0425	3.369	43.1083	48.541	44.0762
2006	120	Cameroon	378.154	263.149	519.058	3.15	61.99	23.79	37.1272	39.2708	3.43	44.5202	49.143	43.9931
2007	120	Cameroon	167.654	69.1383	450.316	3.87	64.38	23.24	38.1839	39.5009	3.49	50.3091	49.746	43.9056
2008	120	Cameroon	488.902	391.171	603.267	3.7	66.84	22.8	39.2927	39.7329	4.061	54.5891	50.35	43.8211
2009	120	Cameroon	374.562	259.77	517.149	4.17	67.52	23.31	40.4349	39.9666	4.632	51.1482	50.954	43.7553
2010	120	Cameroon	244.014	140.161	400.088	3.95	68.92	23.19	41.607	40.2024	5.203	50.0334	51.559	43.7017
2011	120	Cameroon	191.262	148.731	241.899	3.41	67.04	22.88	42.8007	40.44	5.355	58.3303	52.164	43.6569
2012	120	Cameroon	353.56	249.416	502.813	4.52	69.19	22.73	44.0218	40.6795	5.507	56.9644	52.769	43.6078
2013	120	Cameroon	405.71	282.143	576.18	4.01	71.88	22.81	45.2759	40.9206	5.659	57.2277	53.373	43.5351
2014	120	Cameroon	228.702	180.315	285.295	3.71	67.74	23.04	46.6669	41.1634	5.811	71.6104	53.976	43.3606
2015	120	Cameroon	223.818	173.916	283.14	4.54	66.6	22.97	48.1551	41.4078	5.964	58.383	54.578	43.1595
2016	120	Cameroon	381.52	308.371	466.94	5.81	70.96	22.8	49.6164	41.654	6.116	57.9937	55.179	43.0446
2017	120	Cameroon	469.768	383.198	573.481	5.72	69.73	22.9	51.0431	41.9013	6.268	56.7458	55.777	42.982
2018	120	Cameroon	210.86	125.983	329.909	6.22	72.33	22.71	52.477	42.1505	6.42	58.3291	56.374	42.8972
2019	120	Cameroon	157.305	119.051	204.604	4.95	72.29	22.82	53.9572	42.4009	6.479	56.7949	56.968	42.7437
2020	120	Cameroon	59.6279	47.3118	72.7953	5.32	72.65	22.45	55.4474	42.6528	6.537	66.1719	57.56	42.5438
2021	120	Cameroon	357.45	252.262	507.908	5.43	70.96	22.69	56.9393	42.9056	6.537	72.5692	58.148	42.3158
2022	120	Cameroon	232.208	128.834	383.851	6.55	73.09	21.95	58.4561	43.1192	6.537	71.9774	58.733	42.0582
2000	148	Chad	297.243	230.108	377.285	0.03	20.46	28.05	6.75992	9.69267	1.283	10.0745	21.637	48.7654
2001	148	Chad	460	371.723	565.591	0.1	20.28	28.12	6.99184	9.77511	1.333	11.6404	21.67	49.0051
2002	148	Chad	306.184	230.669	398.236	0.12	20.38	28.47	7.23967	9.85771	1.383	18.0174	21.702	49.1366
2003	148	Chad	123.964	39.5708	264.34	0.13	21.46	28.88	7.53481	9.94081	1.433	18.0202	21.735	48.9932
2004	148	Chad	380.174	300.655	476.717	0.02	18.09	28.63	7.87805	10.0242	1.484	27.7499	21.768	48.6746
2005	148	Chad	285.659	218.514	366.5	0.29	22.86	28.61	8.20211	10.108	1.54	31.2761	21.801	48.5555
2006	148	Chad	231.385	149.917	344.079	0.32	23	28.44	8.50256	10.1921	1.596	33.8651	21.834	48.6204
2007	148	Chad	353.578	282.715	435.895	0.17	21.84	28.23	8.80056	10.2767	1.652	34.0424	21.868	48.7039
2008	148	Chad	475.898	359.571	598.297	0.25	23.05	27.91	9.11396	10.3615	1.709	36.8992	21.901	48.7011
2009	148	Chad	214.28	154.443	289.696	0.26	22.56	28.91	9.44548	10.4836	1.765	34.8244	21.934	48.6906
2010	148	Chad	111.358	53.2189	286.402	0.55	27.54	28.04	9.77809	10.6144	1.812	35.2601	21.985	48.7588
2011	148	Chad	314.62	210.493	446.991	0.27	23.83	27.71	10.1294	10.7545	1.858	37.3587	22.054	48.7462
2012	148	Chad	325.516	213.44	474.714	0.46	26.62	27.81	10.4916	10.9049	1.905	36.2025	22.142	48.6982
2013	148	Chad	379.059	262.024	529.887	0.37	23.43	28.2	10.8728	11.0657	1.952	38.5941	22.248	48.6138
2014	148	Chad	183.451	134.411	247.124	0.27	25.08	28.1	11.268	11.2377	1.999	42.1628	22.372	48.5078
2015	148	Chad	211.811	164.945	260.318	0.12	23	27.86	11.6325	11.4219	2.046	33.8209	22.515	48.5267
2016	148	Chad	233.826	159.936	334.291	0.23	24.45	28.34	12.0034	11.6188	2.092	31.9604	22.677	48.5127
2017	148	Chad	406.229	275.833	585.335	0.18	23.45	28.35	12.4069	11.8292	2.139	29.9936	22.858	48.3988
2018	148	Chad	227.438	177.628	288.467	0.49	26.42	28	12.8308	12.0541	2.186	31.2044	23.059	48.2481
2019	148	Chad	215.567	163.363	277.606	0.49	26.72	28.12	13.2507	12.294	2.233	30.24	23.279	48.1221
2020	148	Chad	307.96	228.863	390.104	0.86	29.93	27.4	13.6791	12.5503	2.283	37.7309	23.52	47.9659
2021	148	Chad	272.509	170.506	418.346	0.65	27.3	27.59	14.1584	12.8235	2.283	37.5916	23.781	47.6822
2022	148	Chad	207.408	122.304	322.913	0.76	30.91	26.8	14.6564	12.9221	2.283	40.1701	24.063	47.4037
2000	231	Ethiopia	344.082	266.005	437.639	1.15	48.73	22.28	67.4115	2.7939	1.485	5.28971	14.74	47.7492
2001	231	Ethiopia	185.425	142.024	238.528	1.28	51.32	22.45	69.4878	3.09531	1.559	5.50955	14.927	47.8192
2002	231	Ethiopia	292.401	222.516	379.081	1.3	50.68	22.81	71.6355	3.39684	1.633	5.14964	15.118	47.7997
2003	231	Ethiopia	149.344	65.4347	395.95	1.76	52.93	22.35	73.8327	3.69805	1.707	5.70984	15.31	47.7151
2004	231	Ethiopia	34.0867	18.82	51.0842	1.57	51.99	22.36	67.4086	4.00925	1.786	5.7386	15.504	47.5915
2005	231	Ethiopia	150.541	35.8234	238.726	1.69	52.48	22.1	69.4378	4.31644	1.865	6.482	15.7	47.4345
2006	231	Ethiopia	245.065	181.693	320.692	2.35	58.96	21.74	71.5068	4.61983	1.944	8.42414	15.899	47.2274
2007	231	Ethiopia	153.02	115.502	197.596	2.37	56.45	21.6	73.6319	4.92163	2.023	11.6321	16.116	46.9476
2008	231	Ethiopia	408.067	321.842	507.356	2.59	54.18	21.23	75.7984	5.24482	2.06	13.0386	16.51	46.6014
2009	231	Ethiopia	441.007	316.872	611.243	2.22	55.14	22.11	77.9803	5.56531	2.097	15.1446	16.91	46.1894
2010	231	Ethiopia	254.285	185.815	340.474	3.76	62.54	21	80.224	5.88367	2.135	16.171	17.319	45.7098
2011	231	Ethiopia	245.716	104.333	651.001	1.47	51.23	22.19	82.5377	6.19978	2.172	14.6229	17.735	45.1783
2012	231	Ethiopia	271.453	209.479	349.655	2.12	53.92	21.87	84.8842	6.51409	2.223	20.0022	18.16	44.6063
2013	231	Ethiopia	242.132	180.171	317.522	3.23	61.61	21.19	87.2242	6.82389	2.274	19.267	18.575	44.0168
2014	231	Ethiopia	324.323	250.013	412.122	2.46	59.33	21.56	89.5987	7.13201	2.325	21.6064	18.998	43.4249
2015	231	Ethiopia	494.039	400.798	602.471	1.69	52.68	22.41	92.0368	7.43845	2.376	23.2182	19.428	42.8518
2016	231	Ethiopia	373.346	292.573	468.565	2.94	59.84	21.54	94.5615	7.74355	2.427	24.3437	19.866	42.3007
2017	231	Ethiopia	369.023	287.901	464.628	2.61	55.99	21.53	97.1744	8.04716	2.411	24.1824	20.31	41.7697
2018	231	Ethiopia	423.809	282.956	605.498	2.78	60.73	21.11	99.8299	8.34992	2.395	23.5206	20.763	41.2894
2019	231	Ethiopia	157.944	118.301	208.668	3.26	61.06	21.71	102.552	8.65204	2.38	25.9351	21.225	40.8608
2020	231	Ethiopia	88.2646	52.6684	131.887	3.4	63.29	21.25	105.37	8.95354	2.391	28.28	21.695	40.4508
2021	231	Ethiopia	242.437	183.885	316.092	3.17	58.61	21.21	108.224	9.25478	2.391	26.0694	22.174	40.0648
2022	231	Ethiopia	239.036	143.046	375.377	1.83	55.89	22.02	111.1	9.33622	2.391	27.0685	22.661	39.7058
2000	454	Malawi	379.98	291.419	483.914	2.63	60.53	25.7	120.025	9.35119	1.184	8.84965	14.61	46.1695
2001	454	Malawi	168.92	130.925	213.171	2.75	58.46	25.96	122.964	9.35303	1.219	7.42543	14.698	46.1253
2002	454	Malawi	422.407	343.443	518.95	2.34	59.14	26.01	126.012	9.35481	1.254	11.1741	14.786	46.0968
2003	454	Malawi	232.058	169.341	309.721	2.89	60.67	25.83	129.206	9.3567	1.29	12.3156	14.875	46.0615
2004	454	Malawi	413.694	332.113	508.728	3.42	62.39	25.59	132.592	9.35854	1.325	15.944	14.964	46.0347
2005	454	Malawi	488.007	399.634	591.613	1.8	56.18	26.51	136.19	11.643	1.36	17.2403	15.054	46.0378
2006	454	Malawi	344.491	265.258	441.531	2.76	61.3	25.7	139.995	13.9195	1.44	20.9505	15.144	46.0521
2007	454	Malawi	182.257	49.8415	377.849	2.63	59.63	26.1	144	16.1882	1.555	25.0217	15.235	46.0718
2008	454	Malawi	453.701	352.577	573.752	2.36	58.98	25.64	148.244	18.4489	1.67	32.7346	15.326	46.1323
2009	454	Malawi	194.59	146.2	253.612	2.71	60.09	25.75	152.692	20.703	1.785	35.5649	15.429	46.2042
2010	454	Malawi	238.112	166.13	331.529	3.08	60.39	26.1	157.26	22.9502	1.901	33.9918	15.544	46.2252
2011	454	Malawi	362.368	277.351	466.272	2.36	60.04	25.81	161.912	25.1903	2.016	39.2924	15.672	46.1978
2012	454	Malawi	174.334	135.744	220.398	2.96	59.53	25.95	166.627	27.4226	1.97	32.5377	15.812	46.1112
2013	454	Malawi	236.772	144.549	370.043	3.13	59.07	25.89	171.424	29.6471	1.924	39.5399	15.966	45.9517
2014	454	Malawi	437.625	346.724	540.61	3.44	59.52	26.08	176.3	31.8631	1.878	35.3377	16.132	45.7218
2015	454	Malawi	196.782	154.171	247.073	2.03	58.88	26.25	181.222	34.0704	1.832	34.9731	16.313	45.429
2016	454	Malawi	470.196	368.95	590.594	2.29	57.55	26.49	186.23	36.2685	1.528	34.0308	16.506	45.066
2017	454	Malawi	419.33	340.393	513.692	2.88	61.12	25.95	191.342	38.4571	1.7	37.6011	16.714	44.6415
2018	454	Malawi	213.717	126.077	336.801	3.22	62.08	25.74	196.522	40.6357	1.872	36.703	16.937	44.1769
2019	454	Malawi	312.577	226.319	423.554	3.41	62.51	25.94	201.801	42.8038	2.042	36.9152	17.174	43.6687
2020	454	Malawi	84.7917	66.0224	104.287	3.62	61.14	25.99	207.19	44.9611	1.627	43.229	17.427	43.1181
2021	454	Malawi	333.695	235.531	473.68	3.04	60.75	25.87	212.635	47.1071	1.627	47.5846	17.695	42.5368
2022	454	Malawi	176.421	138.604	221.223	4.75	62.52	25.56	218.166	49.2413	1.627	39.6599	17.98	41.9334
2000	466	Mali	366.168	282.906	468.196	0.33	24.46	28.35	9.47335	15.4102	3.013	14.0047	28.356	46.5983
2001	466	Mali	431.24	299.358	621.55	0.26	22.95	28.5	9.76254	16.6942	3.165	13.159	29.075	46.4921
2002	466	Mali	204.964	141.044	283.97	0.24	22.48	28.55	10.0706	18.0121	3.317	15.8949	29.806	46.4063
2003	466	Mali	53.0525	29.4238	79.531	0.54	27.32	28.44	10.3959	19.3629	3.469	18.7694	30.547	46.3634
2004	466	Mali	185.088	84.7056	362.887	0.21	22.59	28.67	10.738	20.7465	3.621	21.7201	31.3	46.3694
2005	466	Mali	403.109	314.891	505.62	0.38	26.53	28.67	11.0955	22.1609	3.773	23.9735	32.06	46.4374
2006	466	Mali	259.368	73.2652	473.454	0.39	25.07	28	11.4655	23.607	3.925	26.9319	32.832	46.5389
2007	466	Mali	313.8	234.123	413.378	0.31	23.87	28.13	11.8488	25.0829	4.077	29.6354	33.612	46.6499
2008	466	Mali	409.679	302.044	523.603	0.31	25.69	28.03	12.2446	26.5889	4.229	33.2138	34.403	46.7837
2009	466	Mali	386.778	272.967	549.507	0.38	26.23	28.43	12.6501	28.1231	4.381	34.6472	35.2	46.943
2010	466	Mali	154.228	63.2091	438.463	0.51	27.37	29.02	13.0678	29.6838	4.533	31.3642	35.999	47.1315
2011	466	Mali	329.269	217.145	478.171	0.4	26.59	28.15	13.4971	31.2703	4.685	31.6796	36.799	47.337
2012	466	Mali	386.778	273.346	549.91	0.7	30.38	27.31	13.897	32.8817	4.837	27.5311	37.599	47.6334
2013	466	Mali	219.526	132.321	344.36	0.34	24.79	28.15	14.3089	34.5172	4.989	30.0926	38.398	47.8752
2014	466	Mali	218.759	165.592	282.587	0.43	25.78	27.97	14.7684	36.1762	5.141	35.7262	39.196	47.9549
2015	466	Mali	131.355	54.1811	358.011	0.43	25.69	28	15.2378	37.8578	5.293	28.9784	39.991	47.9908
2016	466	Mali	231.873	148.478	347.77	0.34	26.18	28.75	15.7281	39.5614	5.283	27.5809	40.783	47.9673
2017	466	Mali	364.564	282.66	460.768	0.5	26.03	28.25	16.2376	41.2864	5.274	28.4947	41.572	47.8893
2018	466	Mali	452.816	324.219	622.252	0.61	28.46	27.98	16.7532	43.0319	5.264	31.1696	42.356	47.7694
2019	466	Mali	173.62	83.8544	324.047	0.64	26.32	27.73	17.2665	44.7977	5.254	31.4089	43.136	47.5809
2020	466	Mali	709.793	518.77	911.416	0.77	30.27	27.99	17.7955	46.5826	5.244	28.2021	43.909	47.3193
2021	466	Mali	219.166	130.805	344.841	0.31	25.54	29.23	18.3485	48.3865	5.244	30.6191	44.677	47.0327
2022	466	Mali	269.141	161.523	418.984	0.31	25.19	28.47	18.9091	50.2086	5.244	29.7429	45.437	46.7501
2000	646	Rwanda	159.154	79.2507	291.817	2.78	66.57	20.45	332.952	44.9054	2.453	9.00399	14.926	46.4295
2001	646	Rwanda	435.651	310.161	591.494	2.57	70.18	20.12	335.918	46.4743	2.57	7.86746	15.829	45.2188
2002	646	Rwanda	401.369	312.479	505.313	2.51	67.86	20.55	340.502	48.0137	2.687	7.32394	16.777	44.3059
2003	646	Rwanda	256.154	191.079	336.782	3.2	69.99	20.33	348.07	49.4008	2.804	17.2593	16.904	43.718
2004	646	Rwanda	46.2622	25.7337	69.2554	4.36	74.58	19.5	357.391	50.7683	2.92	20.2341	16.908	43.3305
2005	646	Rwanda	264.991	202.875	342.408	3.27	72.09	20.1	367.026	52.1358	3.037	25.0209	16.912	43.0768
2006	646	Rwanda	383.451	272.476	528.95	3.16	71.55	20.12	376.946	53.5034	3.182	27.1568	16.917	42.9329
2007	646	Rwanda	350.605	278.992	432.947	4.28	77.21	19.2	387.107	54.8708	3.327	33.5077	16.921	42.8503
2008	646	Rwanda	429.373	293.395	608.599	4.26	76.78	19.01	397.417	56.2381	3.472	39.9461	16.925	42.7662
2009	646	Rwanda	170.909	129.384	220.391	4.41	76.12	19.35	407.8	57.6055	3.616	43.9968	16.93	42.6254
2010	646	Rwanda	163.708	122.996	212.32	3.89	75.52	19.66	418.223	58.9727	3.761	47.9692	16.934	42.4153
2011	646	Rwanda	292.099	75.7396	549.871	3.96	75.47	19.47	428.607	60.3399	3.763	51.6499	16.938	42.1656
2012	646	Rwanda	90.1599	34.1325	182.221	3.82	75.32	19.49	438.991	61.707	3.766	57.2645	16.943	41.9073
2013	646	Rwanda	235.303	134.097	378.596	2.96	73.57	19.76	449.669	63.0741	3.911	47.7545	16.947	41.6574
2014	646	Rwanda	369.775	292.282	460.575	3.66	74.75	19.86	460.671	64.4397	4.056	50.64	16.967	41.4115
2015	646	Rwanda	117.795	91.7841	144.736	2.95	72.67	20.29	471.829	65.8025	4.095	48.8134	17.004	41.1487
2016	646	Rwanda	381.665	307.59	464.932	2.54	71.83	20.35	483.145	67.1618	4.175	50.7783	17.056	40.8507
2017	646	Rwanda	407.446	275.518	587.344	2.58	70.05	20.71	494.611	68.5163	4.255	48.276	17.125	40.5135
2018	646	Rwanda	404.733	288.919	552.277	3.67	78.09	19.15	506.202	69.8649	4.335	51.3532	17.211	40.123
2019	646	Rwanda	235.924	136.856	379.543	3.7	76.45	19.9	517.88	71.2065	4.607	50.7522	17.313	39.6629
2020	646	Rwanda	69.8897	42.8572	102.288	5.05	80.61	19.2	529.625	72.54	4.878	58.2934	17.432	39.1566
2021	646	Rwanda	176.268	95.7555	380.319	4.23	79.88	19.14	541.356	73.8641	4.878	60.4622	17.568	38.6403
2022	646	Rwanda	257.972	199.148	329.619	4.62	79.76	18.96	553.345	73.8264	4.878	76.8383	17.721	38.1568
2000	894	Zambia	152.693	34.3655	255.986	2.99	60.14	21.52	13.4756	19.945	5.391	15.0013	34.802	44.5505
2001	894	Zambia	221.704	172.625	281.814	3.25	67.29	20.43	13.8893	20.721	5.482	19.1535	35.002	44.529
2002	894	Zambia	368.329	296.143	454.529	2.62	58.85	21.66	14.3235	21.5996	5.573	23.1925	35.475	44.5772
2003	894	Zambia	259.134	190.822	344.596	2.59	58.94	21.59	14.775	22.4737	5.664	26.7576	35.951	44.6335
2004	894	Zambia	60.8602	33.837	91.2807	2.8	62.21	21.27	15.252	23.3427	5.755	30.095	36.43	44.7154
2005	894	Zambia	364.118	282.524	458.929	1.6	54.67	22.36	15.764	24.2059	5.846	44.996	36.911	44.8245
2006	894	Zambia	389.707	310.777	482.305	3.07	62.77	21.29	16.3165	25.0632	5.937	58.6818	37.395	44.9375
2007	894	Zambia	300.269	232.756	383.851	3.39	64.25	21.1	16.9024	25.9138	6.028	51.2443	37.881	45.029
2008	894	Zambia	412.446	307.686	544.902	3.06	64.24	20.57	17.5161	26.7577	6.119	61.4542	38.371	45.1218
2009	894	Zambia	388.806	271.631	547.014	3.48	66.53	20.63	18.1471	27.5935	6.21	58.6106	38.861	45.2656
2010	894	Zambia	260.653	187.804	347.494	2.85	64.89	21.21	18.7864	28.4218	6.301	57.6726	39.355	45.3287
2011	894	Zambia	391.829	277.925	555.377	2.35	61.35	21.31	19.4216	29.2415	6.392	64.3181	39.851	45.2375
2012	894	Zambia	231.933	159.199	326.322	2.59	60.66	21.56	20.0616	30.0534	6.483	69.176	40.354	45.0987
2013	894	Zambia	209.292	128.189	325.087	2.72	60.67	21.51	20.7146	30.857	6.574	83.2936	40.865	44.9363
2014	894	Zambia	176.773	117.515	256.868	2.99	64.82	21.22	21.3822	31.6512	6.665	65.3926	41.382	44.7713
2015	894	Zambia	408.964	320.511	515.93	3.11	62.4	21.65	22.0599	32.4357	6.756	57.3877	41.907	44.5264
2016	894	Zambia	451.336	354.895	564.242	2.12	60.74	21.83	22.7531	33.2094	6.847	55.3953	42.438	44.2196
2017	894	Zambia	492.796	400.596	600.928	3.65	66.97	21.18	23.4619	33.9718	6.938	70.9328	42.976	43.9599
2018	894	Zambia	209.18	121.809	336.057	2.72	64.96	21.31	24.1778	34.7221	7.029	69.8277	43.521	43.7638
2019	894	Zambia	206.289	120.057	332.748	2.42	63.36	21.77	24.9046	35.4595	7.157	85.0235	44.072	43.5912
2020	894	Zambia	383.577	298.902	472.455	3.41	65	21.41	25.6385	36.1833	7.285	60.0178	44.629	43.3726
2021	894	Zambia	322.777	199.226	494.353	2.81	68.15	20.7	26.3706	36.242	7.285	74.838	45.192	43.1329
2022	894	Zambia	243.366	192.436	304.499	4.39	71.63	20.29	27.1095	36.3014	7.285	76.0596	45.761	42.9162
2000	834	Tanzania	297.225	230.119	376.818	1.59	57.96	23.29	38.6771	6.45456	4.226	12.3303	22.309	48.0216
2001	834	Tanzania	275.949	212.31	351.588	1.36	59.76	23.01	39.7362	7.66547	4.261	15.174	22.674	47.8267
2002	834	Tanzania	228.318	172.632	296.618	2.1	62.04	23.09	40.7782	8.88565	4.296	17.0356	23.044	47.6221
2003	834	Tanzania	154.65	114.05	204.708	1.56	57.59	23.67	41.8713	10.1362	4.412	20.3944	23.611	47.4389
2004	834	Tanzania	130.302	95.7691	172.318	2.12	61.71	23.08	43.0229	11.3353	4.527	23.4494	24.223	47.2732
2005	834	Tanzania	121.963	90.0385	160.464	1.14	58.81	23.6	44.2335	12.5338	4.642	27.7137	24.845	47.1159
2006	834	Tanzania	132.595	97.5416	176.721	2.25	63.36	23.17	45.4898	13.7318	4.758	35.5976	25.478	46.952
2007	834	Tanzania	124.198	91.9292	165.081	1.99	64.73	22.81	46.7775	14.9288	4.873	36.2361	26.121	46.7865
2008	834	Tanzania	141.389	104.943	187.478	2.2	64.79	22.5	48.0591	16.125	4.988	36.2618	26.776	46.6108
2009	834	Tanzania	110.863	80.7945	149.318	2.89	63.96	22.84	49.2594	17.3196	5.104	33.9994	27.439	46.4297
2010	834	Tanzania	117.347	82.5584	161.939	1.6	61.04	23.23	50.5289	18.513	5.219	37.1849	28.114	46.2529
2011	834	Tanzania	346.245	272.662	437.953	2.24	61.34	23.26	51.9636	19.7043	5.334	37.7518	28.798	46.0952
2012	834	Tanzania	314.451	241.979	402.167	2.42	67.24	22.28	53.4819	20.8937	5.449	41.9965	29.493	45.9279
2013	834	Tanzania	170.938	125.773	225.584	1.78	59.93	23.45	55.1187	22.0803	5.464	43.4693	30.196	45.7218
2014	834	Tanzania	141.007	103.555	188.618	2.52	66.96	22.74	56.843	23.2631	5.479	39.8546	30.904	45.467
2015	834	Tanzania	129.972	95.9625	172.752	2.02	63.28	23.3	58.7277	24.4416	5.494	33.2718	31.617	45.1786
2016	834	Tanzania	143.051	105.465	190.271	2.53	67.09	22.54	60.7632	25.615	5.525	36.6527	32.333	44.8585
2017	834	Tanzania	335.162	261.601	423.865	2.43	65.22	23.11	62.8278	26.783	5.557	39.0356	33.053	44.5091
2018	834	Tanzania	197.756	146.371	259.461	4.31	70.7	21.97	64.8421	27.9448	5.589	41.2815	33.776	44.145
2019	834	Tanzania	115.103	84.718	151.666	4.69	73.32	22.11	66.8039	29.0994	5.615	39.9818	34.5	43.7568
2020	834	Tanzania	120.52	80.7935	172.171	4.6	77.31	21.42	68.8336	30.2468	5.64	31.721	35.227	43.3344
2021	834	Tanzania	121.529	81.8359	174.554	3.23	70.22	22.03	70.9307	30.4322	5.64	37.5631	35.954	42.8932
2022	834	Tanzania	252.031	192.518	323.279	3.37	68.65	22.06	73.0547	30.6179	5.64	35.6478	36.682	42.4387
2000	72	Botswana	16.722	11.4965	26.8923	1.6	46.88	21.89	2.95976	51.9161	7.61	206.931	53.219	38.383
2001	72	Botswana	6.59005	4.0158	11.9414	1.3	41.53	22.95	3.02129	53.3312	7.744	203.012	54.062	37.7127
2002	72	Botswana	3.0778	1.72081	5.97602	0.84	34.45	23.34	3.07865	54.6351	7.878	206.114	54.57	37.0681
2003	72	Botswana	1.53735	0.6118	3.8781	0.79	35.96	23.58	3.1333	55.9306	8.012	269.585	55.029	36.4639
2004	72	Botswana	0.9874	0.20202	3.04744	1.41	42.17	22.67	3.18872	57.2354	8.146	297.251	55.488	35.9312
2005	72	Botswana	1.16823	0.67414	2.36036	0.98	36.42	24.1	3.24648	58.5485	8.28	281.388	55.944	35.4761
2006	72	Botswana	3.75462	2.49315	6.11017	1.64	44.33	21.95	3.3076	59.8708	8.398	258.019	56.4	35.0956
2007	72	Botswana	0.99075	0.37343	2.4424	1.32	36.74	22.99	3.37233	61.6023	8.516	305.22	57.928	34.7706
2008	72	Botswana	1.84624	0.89342	3.68949	0.98	39.35	23.08	3.44074	63.3425	8.634	324.543	59.444	34.4852
2009	72	Botswana	2.00155	0.98053	3.74546	1.56	44.27	22.56	3.51256	65.0869	8.752	336.531	60.937	34.2431
2010	72	Botswana	1.60738	0.96412	2.83696	1.56	43.77	22.98	3.58744	66.8374	8.87	389.552	62.412	34.0752
2011	72	Botswana	0.48204	0.36895	0.6637	1.25	41.57	22.29	3.65877	68.5923	9.1	427.707	63.865	34.0256
2012	72	Botswana	0.21078	0.16225	0.28774	0.88	35.99	23.23	3.72067	70.1499	9.33	418.822	64.768	34.1651
2013	72	Botswana	0.49319	0.38435	0.71362	0.95	37.04	23.19	3.77725	71.6801	9.56	433.292	65.572	34.3542
2014	72	Botswana	1.38464	1.07969	1.84641	1.62	44.96	22.01	3.83259	73.2177	9.79	418.825	66.368	34.4119
2015	72	Botswana	0.29772	0.23032	0.40374	0.85	34.79	23.99	3.88769	74.7621	10.02	374.791	67.155	34.3502
2016	72	Botswana	0.63093	0.48859	0.84382	0.89	37.27	24.04	3.94328	76.0173	10.1	389.311	67.933	34.1854
2017	72	Botswana	1.8394	1.42178	2.52204	1.34	43.41	22.81	3.99969	77.2692	10.18	471.051	68.7	33.9382
2018	72	Botswana	0.49593	0.38394	0.67929	0.79	37.19	23.66	4.05685	78.5139	10.26	447.447	69.446	33.6298
2019	72	Botswana	0.15568	0.12008	0.21602	0.83	35.35	24.38	4.11498	79.7517	10.34	438.285	70.172	33.2698
2020	72	Botswana	1.04489	0.72975	1.5857	1.22	40.91	23.04	4.17464	80.0262	10.42	386.289	70.877	32.8742
2021	72	Botswana	0.61769	0.47842	0.85895	1.95	46.09	22.14	4.23736	80.2922	10.478	492.143	71.56	32.5854
2022	72	Botswana	0.31081	0.24085	0.4255	1.24	43.34	23.09	4.30521	80.5508	10.478	477.833	72.224	32.4232
2000	174	Comoros	66.3316	44.467	89.1631	2.24	76.34	26.42	288.06	29.2037	7.26262	47.5943	28.08	47.0079
2001	174	Comoros	65.0362	43.5973	87.4209	1.95	76.33	26.51	294.046	30.436	7.31068	45.3459	28.036	46.7409
2002	174	Comoros	63.7818	42.7567	85.7352	2.82	76.65	26.76	300.335	31.0518	7.35875	51.1213	27.992	46.5513
2003	174	Comoros	62.5436	41.9273	84.0703	2.31	76.58	26.84	306.178	31.6201	7.40681	63.9179	27.947	46.2879
2004	174	Comoros	61.3108	41.101	82.4136	2.94	76.68	26.73	312.039	32.1413	7.45487	70.6181	27.903	45.7444
2005	174	Comoros	60.0928	40.2846	80.7767	2.31	75.91	26.92	318.472	32.6181	7.50293	67.7986	27.875	45.0296
2006	174	Comoros	58.8878	39.4769	79.1571	3.42	77.92	26.58	324.961	33.0502	7.51628	65.7292	27.863	44.3208
2007	174	Comoros	57.6934	38.6757	77.5508	1.87	76.59	26.86	331.503	33.4374	7.52963	69.872	27.867	43.6178
2008	174	Comoros	56.5031	37.8779	75.9528	2.68	77.52	26.46	338.155	33.7793	7.54298	73.755	27.886	42.9223
2009	174	Comoros	55.322	37.0852	74.3635	2.04	76.53	26.84	344.947	34.0757	7.55633	69.4849	27.921	42.2472
2010	174	Comoros	55.6961	55.6961	55.6961	2.16	76.26	26.96	351.873	34.3266	7.56968	69.2152	27.973	41.6116
2011	174	Comoros	37.0946	37.0946	37.0946	2.74	76.8	26.8	358.977	34.5314	7.68717	81.1986	28.04	41.0268
2012	174	Comoros	72.8066	72.8066	72.8066	3.05	76.99	26.68	366.271	34.6899	7.80465	77.1022	28.123	40.4987
2013	174	Comoros	76.0031	76.0031	76.0031	2.16	76.17	26.83	374.096	34.8021	7.92213	81.8177	28.223	40.1513
2014	174	Comoros	3.08279	3.08279	3.08279	2.91	76.22	26.89	382.323	34.8674	8.03962	84.6394	28.338	39.9669
2015	174	Comoros	2.58006	2.58006	2.58006	2.92	76.27	27.05	390.479	35.8153	8.1571	61.163	28.47	39.7897
2016	174	Comoros	1.96588	1.96588	1.96588	2.71	76.12	26.88	398.571	35.8349	8.17579	63.531	28.619	39.5888
2017	174	Comoros	5.11512	5.11512	5.11512	2.88	76.81	27.06	406.593	35.8566	8.19448	75.0134	28.784	39.2775
2018	174	Comoros	19.5617	19.5617	19.5617	3.56	76.6	26.86	414.61	35.8805	8.21317	74.8915	28.965	38.9014
2019	174	Comoros	22.2494	22.2494	22.2494	3.56	77.95	27.24	422.664	35.9067	8.23186	78.2367	29.164	38.5632
2020	174	Comoros	5.63904	5.63904	5.63904	4.89	77.54	27.06	431.039	35.9425	8.25055	89.6782	29.38	38.2678
2021	174	Comoros	12.8246	12.8246	12.8246	2.65	76.4	26.84	439.642	35.9669	8.32264	100.042	29.613	38.0041
2022	174	Comoros	24.708	24.708	24.708	2.47	76.58	26.62	448.247	35.9921	8.32264	122.936	29.864	37.7187
2000	178	Congo	350.899	243.732	490.8	4.35	85.24	24.89	9.22795	11.9201	2.71569	17.3509	58.695	42.4532
2001	178	Congo	351.613	235.488	502.185	5.82	87.05	24.71	9.58283	11.9685	2.87284	20.3039	59.156	41.9089
2002	178	Congo	329.323	214.331	483.155	5.04	85.09	25.22	9.81192	12.2943	3.03	16.9903	59.617	41.8794
2003	178	Congo	328.434	212.207	487.324	4.85	86.88	25.04	10.0901	12.6237	3.18715	21.5148	60.076	41.7382
2004	178	Congo	324.574	205.682	488.877	4.39	84.13	25.5	10.4409	13.0815	3.34431	27.5006	60.533	41.4425
2005	178	Congo	306.469	195.517	461.687	3.8	76.56	26.54	10.824	13.5511	3.50146	30.903	60.988	41.1478
2006	178	Congo	284.135	189.061	407.382	3.37	77.63	26.21	11.2369	14.0325	3.65862	35.9421	61.441	40.867
2007	178	Congo	253.79	175.376	353.281	5.33	82.27	25.39	11.6557	14.526	3.81578	41.9671	61.893	40.6714
2008	178	Congo	226.413	156.695	316.221	5.23	84.73	24.96	12.0454	15.032	3.97293	63.4182	62.346	40.6661
2009	178	Congo	214.934	149.404	300.566	5.6	86.31	24.99	12.5365	15.5507	4.13009	48.6531	62.8	40.5268
2010	178	Congo	215.372	147.813	298.662	6.06	87.27	24.98	13.0667	16.0823	4.28724	54.5623	63.256	40.4284
2011	178	Congo	216.253	147.784	305.828	5.61	86.32	24.85	13.4985	16.6268	4.4444	59.5135	63.712	40.6396
2012	178	Congo	215.456	146.688	305.704	5.31	86.2	24.7	13.8813	17.1843	4.60155	71.2767	64.169	40.9553
2013	178	Congo	216.856	144.363	314.682	5.3	85.77	24.82	14.2228	17.7552	4.74208	71.8582	64.627	41.3342
2014	178	Congo	211.497	139.906	305.901	5.58	86.94	24.84	14.5707	18.3394	4.88261	71.0312	65.085	41.6556
2015	178	Congo	208.769	136.116	307.641	4.58	85.92	24.94	14.927	18.9369	5.02314	57.3029	65.543	41.9068
2016	178	Congo	213.486	131.425	325.359	5.34	85.53	25.29	15.2929	19.5481	5.16367	54.3	66.001	42.0531
2017	178	Congo	232.528	145.71	350.512	4.85	85.89	25.23	15.6691	20.1729	5.3042	52.2998	66.459	42.088
2018	178	Congo	243.847	157.878	365.923	5.78	87.14	24.85	16.056	20.2686	5.44472	47.3102	66.916	42.0513
2019	178	Congo	236.969	149.985	353.373	4.07	83.02	25.66	16.447	20.3643	5.58525	58.4211	67.373	41.9421
2020	178	Congo	230.55	146.031	347.331	5.39	86.86	25.03	16.8457	20.4597	5.72578	80.0974	67.829	41.7662
2021	178	Congo	222.156	141.55	334.408	5.07	86.9	24.93	17.2538	20.5548	5.86631	79.3296	68.283	41.5436
2022	178	Congo	212.34	133.46	322.632	5.57	86.84	24.86	17.6723	20.6721	6.00684	50.6057	68.736	41.2564
2000	262	Djibouti	3.11071	2.39728	3.82414	0.6	55.01	27.35	32.2398	47.0518	1.50613	35.4895	76.532	39.5672
2001	262	Djibouti	3.1112	2.39698	3.82368	0.93	57.43	27.03	33.2749	47.0731	1.58741	33.6143	76.578	39.1284
2002	262	Djibouti	3.11094	2.39784	3.82404	0.74	56.19	27.7	34.3216	47.0945	1.67308	39.4997	76.624	38.73
2003	262	Djibouti	3.11041	2.39771	3.82477	1.92	62.36	26.68	35.0957	47.1159	1.76337	46.2752	76.67	38.5697
2004	262	Djibouti	3.11057	2.39688	3.82426	1.03	56.29	27.51	35.6395	47.1372	1.85854	40.0495	76.716	38.5462
2005	262	Djibouti	3.11036	2.39777	3.82456	1.63	61.58	26.8	36.2022	48.4453	1.95884	45.1255	76.761	38.4264
2006	262	Djibouti	3.11112	2.39789	3.82434	1.67	60.3	26.97	36.9182	49.7499	2.06455	53.2634	76.807	38.1172
2007	262	Djibouti	3.11023	2.39663	3.82382	0.85	58.03	27.2	37.7277	51.0505	2.17597	55.1825	76.853	37.6892
2008	262	Djibouti	3.11135	2.39694	3.82424	0.82	55.41	26.98	38.5131	52.3471	2.2934	55.9098	76.899	37.2404
2009	262	Djibouti	3.97482	3.97482	3.97482	0.79	57.12	27.51	39.3239	53.6393	2.41717	56.9213	76.944	36.7891
2010	262	Djibouti	1.4652	1.4652	1.4652	1.42	60.55	26.93	40.1316	54.9326	2.54762	55.7044	76.999	36.3644
2011	262	Djibouti	3.11018	2.39704	3.82474	0.47	53.85	27.73	40.9214	56.2272	2.68511	61.8985	77.064	35.9409
2012	262	Djibouti	3.11048	2.39783	3.82452	0.53	56.52	27.38	41.7061	57.5228	2.83003	64.8537	77.138	35.5178
2013	262	Djibouti	2.31085	2.31085	2.31085	1.28	59.37	27.16	42.4859	58.8201	2.98276	60.5723	77.222	35.0719
2014	262	Djibouti	12.7256	12.7256	12.7256	0.96	58.28	27.27	43.2579	60.1182	3.14373	65.5373	77.314	34.5777
2015	262	Djibouti	12.5534	12.5534	12.5534	0.57	55	28	44.017	61.4189	3.3047	79.5426	77.417	34.0337
2016	262	Djibouti	18.0123	18.0123	18.0123	0.83	57.18	27.74	44.765	62.7208	3.46568	68.8274	77.528	33.4449
2017	262	Djibouti	18.985	18.985	18.985	0.7	55.02	27.84	45.5065	64.0245	3.62665	64.6509	77.648	32.8238
2018	262	Djibouti	31.3378	31.3378	31.3378	0.45	54.72	27.78	46.2417	65.3303	3.78762	68.4608	77.777	32.1897
2019	262	Djibouti	61.3378	61.3378	61.3378	1.62	58.98	27.6	46.9676	66.6382	3.84189	68.274	77.915	31.5753
2020	262	Djibouti	89.9479	89.9479	89.9479	0.7	57.58	27.64	47.6785	66.7226	3.89615	66.9282	78.062	31.0086
2021	262	Djibouti	71.0621	71.0621	71.0621	1.33	58.61	27.09	48.3714	66.8116	3.95042	87.1693	78.217	30.4978
2022	262	Djibouti	48.359	48.359	48.359	1.15	58.88	27.45	49.055	66.9052	3.95042	81.8097	78.38	30.0234
2000	226	Equatorial Guinea	347.964	228.66	508.746	7.3	90.87	23.99	25.0723	54.7905	6.39371	18.2404	49.092	42.7347
2001	226	Equatorial Guinea	346.907	230.025	501.398	7.07	90.75	23.85	26.7321	55.777	6.4845	26.856	50.832	42.1905
2002	226	Equatorial Guinea	339.488	224.874	491.404	7.09	91.11	24.23	28.4477	56.747	6.57657	71.3716	52.573	41.5153
2003	226	Equatorial Guinea	346.473	239.389	489.276	6.72	91.35	24.35	30.2268	57.6992	6.66995	81.2089	54.307	40.778
2004	226	Equatorial Guinea	360.001	256.531	490.624	7.59	91.31	24.22	32.0826	58.6336	6.76466	96.1236	56.033	40.0539
2005	226	Equatorial Guinea	371.353	272.289	493.492	6.43	90.72	24.32	33.7742	59.5484	6.86072	112.035	57.74	39.5168
2006	226	Equatorial Guinea	369.252	270.36	489.951	6.52	91.2	24.17	35.3063	60.4443	6.95814	131.677	59.431	39.1705
2007	226	Equatorial Guinea	363.791	266.789	483.848	7.92	90.97	24.27	36.9356	61.3208	7.05694	164.447	61.1	38.8947
2008	226	Equatorial Guinea	338.898	244.772	460.192	6.5	90.87	24.2	38.6642	62.1777	7.15714	203.971	62.745	38.6718
2009	226	Equatorial Guinea	305.283	217.023	415.294	7.63	91.07	24.25	40.4875	63.0143	7.25877	234.88	64.358	38.4869
2010	226	Equatorial Guinea	288.533	204.777	398.89	8.88	90.59	24.41	42.3916	63.8312	7.36184	222.452	65.94	38.3347
2011	226	Equatorial Guinea	290.323	206.533	398.37	5.84	90.3	24.18	44.2722	64.6284	7.46637	245.803	67.488	38.2725
2012	226	Equatorial Guinea	311.956	223.274	424.441	7.8	90.93	24.08	46.1135	65.4061	7.57239	262.155	69	38.2819
2013	226	Equatorial Guinea	332.887	233.569	457.957	7.38	90.62	24.1	47.9935	66.0469	7.67991	267.671	69.544	38.2953
2014	226	Equatorial Guinea	334.347	229.714	470.76	7.83	90.69	24.16	49.9047	66.1151	7.78743	272.726	70.083	38.3142
2015	226	Equatorial Guinea	332.338	212.758	494.084	7.74	90.32	24.28	51.8333	66.1825	7.89496	212.265	70.616	38.3219
2016	226	Equatorial Guinea	313.547	188.105	492.056	7.71	90.52	24.7	53.7678	66.2485	8.00248	213.118	71.138	38.3064
2017	226	Equatorial Guinea	288.016	173.774	451.65	7.87	90.65	24.44	55.7004	66.3128	8.11	214.527	71.646	38.2604
2018	226	Equatorial Guinea	263.832	169.453	396.722	6.65	90.59	24.38	57.6265	66.5726	8.16711	231.102	72.143	38.1592
2019	226	Equatorial Guinea	243.03	161.149	352.135	3.27	89.22	24.61	59.5429	66.7213	8.22422	215.542	72.627	37.9853
2020	226	Equatorial Guinea	239.743	159.248	344.199	4.76	88.18	24.77	61.1932	66.8701	8.28133	230.321	73.1	37.8951
2021	226	Equatorial Guinea	235.154	151.88	348.079	6.43	89.07	24.71	62.7018	67.0188	8.28133	236.815	73.561	37.8354
2022	226	Equatorial Guinea	232.433	150.946	343.881	7.84	89.08	24.45	64.2975	67.1675	8.28133	190.094	74.01	37.6781
2000	232	Eritrea	17.8492	5.82978	36.8401	0.26	49.47	30.87	22.2478	8.2853	4.348	14.0303	26.587	45.2371
2001	232	Eritrea	22.1213	7.64311	43.3496	0.39	49.35	31.07	22.8919	8.64048	4.394	14.9068	27.455	44.9643
2002	232	Eritrea	12.8848	4.69728	24.7889	0.34	48.64	31.19	23.6929	8.9863	4.462	15.7754	28.341	44.4319
2003	232	Eritrea	18.6516	8.44987	32.4532	0.37	49.1	31.24	24.6921	9.32209	4.519	19.8148	29.244	43.6776
2004	232	Eritrea	5.46226	2.69977	9.55456	0.29	48.02	31.15	21.4765	9.64745	4.638	23.1562	30.164	43.0057
2005	232	Eritrea	9.77494	5.72438	14.934	0.48	49.52	30.96	21.9889	9.96154	4.71098	21.9265	31.099	42.9435
2006	232	Eritrea	5.70745	3.62556	8.01643	1.02	52.13	30.75	22.3422	10.2644	4.70347	23.7741	32.051	43.1326
2007	232	Eritrea	12.8386	8.23636	17.9379	0.42	50.03	30.96	22.6651	10.5551	4.69598	19.6267	33.017	43.3
2008	232	Eritrea	6.90902	4.42911	9.59555	0.4	46.91	31.09	23.2644	10.8338	4.6885	21.5507	34	43.0202
2009	232	Eritrea	8.9679	5.69662	12.7571	0.34	48.18	31.3	23.8531	11.022	4.68103	24.351	34.585	42.7315
2010	232	Eritrea	26.5179	16.8222	37.4981	0.54	47.56	31.37	24.3273	11.2019	4.67357	26.0065	35.175	42.5706
2011	232	Eritrea	23.9053	15.3633	33.295	0.49	49.92	30.84	24.7627	11.3735	4.66613	35.5513	35.771	42.3165
2012	232	Eritrea	16.1357	10.1054	23.1948	0.17	48.27	31.28	25.0821	11.5365	4.65869	27.7869	36.372	42.1151
2013	232	Eritrea	14.9586	9.51865	21.1397	0.56	49.5	31.2	25.3976	11.6363	4.65127	31.6377	36.979	41.962
2014	232	Eritrea	33.0048	21.2651	46.006	0.75	49.84	31	25.5723	11.7367	4.64385	32.9345	37.59	41.9957
2015	232	Eritrea	19.1676	12.2874	26.6998	0.78	49.31	31.38	25.6469	11.8379	4.63643	29.2221	38.206	42.1052
2016	232	Eritrea	25.7217	14.1845	41.1547	1.17	51.84	30.92	25.8074	11.94	4.62901	26.0059	38.827	42.0788
2017	232	Eritrea	34.1273	22.0163	47.2139	0.78	49.11	31.15	26.0206	12.0415	4.62158	25.1027	39.451	41.9128
2018	232	Eritrea	28.942	18.6235	40.1647	0.96	50.38	31.13	26.3695	12.1431	4.77818	26.682	40.08	41.5062
2019	232	Eritrea	57.2713	36.6451	79.0038	1.6	52.57	30.93	26.7606	12.2448	4.93477	28.4293	40.712	40.9911
2020	232	Eritrea	44.626	28.6635	62.0553	0.92	52.46	30.59	27.1914	12.3464	5.09136	27.6624	41.347	40.4027
2021	232	Eritrea	25.6602	16.5165	35.6967	1.75	50.83	30.75	27.6781	12.448	5.09136	27.5876	41.985	39.7739
2022	232	Eritrea	37.76	24.2611	52.291	1.3	52.51	30.71	28.1677	12.5497	5.09136	27.0835	42.625	39.201
2000	748	Eswatini	2.72754	1.16103	4.74114	2.73	70.86	18.53	60.5473	48.7303	12.18	76.9313	22.686	43.5998
2001	748	Eswatini	4.78411	4.78411	4.78411	1.82	63.61	19.55	61.1084	49.2498	12.35	75.4135	22.555	42.893
2002	748	Eswatini	2.27716	2.27716	2.27716	1.6	60.65	19.56	61.5954	49.9803	12.52	74.6648	22.425	42.2946
2003	748	Eswatini	1.1536	1.1536	1.1536	1.08	59.04	20.25	62.0174	50.7288	12.69	131.41	22.296	41.8019
2004	748	Eswatini	1.92351	1.92351	1.92351	2.3	65.58	19.47	62.393	51.4948	12.86	175.895	22.166	41.3942
2005	748	Eswatini	0.9296	0.9296	0.9296	1.8	62.95	20.24	62.7338	52.2789	13.03	217.261	22.038	41.0528
2006	748	Eswatini	0.51364	0.51364	0.51364	2.64	66.92	18.85	63.0486	53.0809	13.2	237.508	21.91	40.7626
2007	748	Eswatini	0.27675	0.27675	0.27675	1.82	60.41	19.74	63.4131	53.9053	13.22	252.243	21.829	40.3867
2008	748	Eswatini	0.19006	0.19006	0.19006	1.85	63.94	19.67	63.8425	54.7678	13.25	265.721	22.045	39.8616
2009	748	Eswatini	0.34576	0.34576	0.34576	2.02	65.02	19.43	64.2531	55.6336	13.32	279.682	22.262	39.3089
2010	748	Eswatini	0.87019	0.87019	0.87019	2.36	65.95	19.6	64.6308	56.5026	13.33	343.043	22.48	38.8011
2011	748	Eswatini	1.22454	1.22454	1.22454	1.97	64.11	18.98	64.9903	57.3745	13.4	365.253	22.7	38.3524
2012	748	Eswatini	1.31425	1.31425	1.31425	2.38	64.28	19.25	65.3409	58.25	13.45	340.03	22.849	37.971
2013	748	Eswatini	2.32492	2.32492	2.32492	2.7	65.94	18.91	65.6971	59.1313	13.54	303.404	22.999	37.6163
2014	748	Eswatini	1.23397	1.23397	1.23397	2.02	62.61	19.3	66.0639	60.0182	13.44	282.434	23.149	37.2169
2015	748	Eswatini	1.00157	1.00157	1.00157	1.6	61.17	20.36	66.4426	60.9106	13.49	250.715	23.3	36.7818
2016	748	Eswatini	0.78148	0.78148	0.78148	2.09	62.89	19.92	66.8318	61.8078	13.51	226.418	23.459	36.3762
2017	748	Eswatini	1.36481	1.36481	1.36481	2.53	65.7	19.33	67.3369	62.7091	13.56	265.502	23.625	35.9795
2018	748	Eswatini	2.1113	2.1113	2.1113	1.96	64.52	19.5	67.961	63.6138	13.66	292.339	23.799	35.557
2019	748	Eswatini	0.76949	0.76949	0.76949	1.87	61.34	20.48	68.5973	64.5214	13.605	320.051	23.981	35.1175
2020	748	Eswatini	0.70482	0.70482	0.70482	1.84	63.28	19.62	69.3447	64.4891	13.55	236.25	24.171	34.6862
2021	748	Eswatini	1.51272	1.51272	1.51272	2.61	63.9	19.26	70.1508	64.4554	13.5622	296.828	24.369	34.285
2022	748	Eswatini	0.63602	0.63602	0.63602	2.76	69.61	19.3	70.8673	64.4202	13.5622	283.883	24.576	33.9506
2000	266	Gabon	330.432	219.235	481.197	5.24	85.7	24.13	4.95041	33.9814	6.15	123.05	78.879	40.8237
2001	266	Gabon	322.67	215.021	464.804	4.18	86.72	23.96	5.08243	34.9372	6.304	120.765	79.633	40.4783
2002	266	Gabon	293.256	189.931	428.831	4.28	83.45	24.69	5.22038	35.9037	6.458	131.851	80.368	40.1139
2003	266	Gabon	248.7	158.481	366.366	4.74	85.77	24.5	5.36481	36.8809	6.612	166.378	81.083	39.7346
2004	266	Gabon	187.827	122.079	274.1	4.67	86.57	24.41	5.51717	37.8688	6.766	182	81.778	39.3515
2005	266	Gabon	147.368	96.4359	216.152	4.16	85.98	24.57	5.67973	38.8672	6.92	189.564	82.452	38.9699
2006	266	Gabon	134.579	86.3327	200.949	3.84	83.83	24.68	5.85375	39.8764	7.05	211.753	83.107	38.592
2007	266	Gabon	129.23	79.6464	200.082	6.03	86.74	24.19	6.03965	40.896	7.18	253.092	83.742	38.2245
2008	266	Gabon	153.189	89.6739	244.889	2.84	83.88	24.51	6.23734	41.9264	7.31	270.238	84.359	37.8802
2009	266	Gabon	197.024	110.303	329.071	7.12	82.23	24.89	6.44839	42.9671	7.44	281.608	84.955	37.5807
2010	266	Gabon	233.911	133.254	387.459	9.61	88.54	24.19	6.67474	44.0185	7.57	206.877	85.533	37.338
2011	266	Gabon	255.255	146.04	416.348	6.07	88.98	23.84	6.91576	45.0802	7.852	261.376	86.092	37.1414
2012	266	Gabon	257.998	144.319	421.341	7.04	89.21	23.69	7.16765	46.1525	8.134	225.077	86.634	36.9636
2013	266	Gabon	249.885	132.078	433.049	6	87.48	23.95	7.42445	47.2349	8.416	261.295	87.156	36.7939
2014	266	Gabon	240.592	123.176	425.698	10.01	89.63	23.85	7.67803	48.3267	8.698	233.054	87.651	36.6582
2015	266	Gabon	233.621	119.762	413.244	6.07	88.34	24.04	7.92094	48.6194	8.98	187.273	88.118	36.582
2016	266	Gabon	228.331	119.596	395.658	4.48	88.83	24.27	8.15115	48.9116	9.094	207.503	88.559	36.5774
2017	266	Gabon	228.145	114.485	410.567	2.16	76.98	25.63	8.37078	49.2033	9.208	192.475	88.976	36.6312
2018	266	Gabon	227.908	113.071	416.468	2.21	72.08	26.07	8.58586	49.4944	9.322	209.287	89.37	36.7075
2019	266	Gabon	228.37	119.786	400.164	1.55	68.79	26.71	8.80081	49.7848	9.436	205.999	89.741	36.7756
2020	266	Gabon	230.208	123.494	395.759	3.32	75.59	25.79	9.01362	49.8242	9.55	225.325	90.092	36.818
2021	266	Gabon	228.918	122.524	391.226	3.02	79.07	25.29	9.2239	49.8613	9.686	228.849	90.423	36.8222
2022	266	Gabon	230.536	122.82	396.563	2.95	76.23	25.47	9.43357	49.8962	9.686	247.096	90.735	36.7738
2000	270	Gambia	312.46	232.596	404.861	1.65	48.94	28	143.783	51.0627	2.239	74.8368	47.868	46.8327
2001	270	Gambia	303.634	223.891	393.703	1.13	43.73	28.96	147.728	49.914	2.32225	55.6505	48.775	46.7149
2002	270	Gambia	294.965	218.589	381.752	1	40.81	29.46	151.748	48.788	2.40551	35.9946	49.683	46.5578
2003	270	Gambia	286.381	211.627	371.41	2.61	50.18	28.33	155.89	47.7243	2.48877	28.3001	50.555	46.3644
2004	270	Gambia	277.87	206.089	360.218	2.34	52.22	28.02	160.209	46.6954	2.57203	32.1561	51.288	46.1401
2005	270	Gambia	269.467	200.271	350.11	2.86	56	27.85	164.727	46.5783	2.65529	33.204	52.02	45.8893
2006	270	Gambia	261.239	193.712	339.147	2.29	53.25	27.62	169.494	46.4863	2.7588	33.4136	52.751	45.6232
2007	270	Gambia	253.249	187.269	326.151	2.19	48.95	27.95	174.484	46.4185	2.86231	35.9108	53.481	45.3491
2008	270	Gambia	245.509	181.608	317.778	3.13	54.96	27.7	179.63	46.3745	2.96583	40.0298	54.211	45.0637
2009	270	Gambia	238.021	176.306	306.649	3.11	57.54	27.05	184.923	46.3535	3.06934	34.5933	54.937	44.7725
2010	270	Gambia	230.8	171.215	297.878	2.6	58.51	27.68	190.378	46.3548	3.17285	32.9983	55.662	44.4989
2011	270	Gambia	237.149	191.779	287.465	1.81	49.79	28.2	196.026	46.3775	3.30561	31.0515	56.384	44.2674
2012	270	Gambia	254.239	203.695	309.614	2.44	52.83	27.87	201.887	46.4212	3.43838	29.5641	57.105	44.083
2013	270	Gambia	202.097	159.226	250.008	2.36	52.86	28.11	207.887	46.4844	3.57114	25.5908	57.82	43.9207
2014	270	Gambia	138.748	108.336	171.747	2.39	52.56	27.98	213.886	46.566	3.67688	17.3374	58.528	43.7464
2015	270	Gambia	199.934	153.859	250.778	2.59	53.69	27.8	219.815	46.6647	3.78262	19.6773	59.228	43.5509
2016	270	Gambia	128.197	96.999	161.768	1.73	51.08	28.4	225.669	46.7788	3.88836	20.7709	59.918	43.3274
2017	270	Gambia	62.1779	46.2983	79.7037	2.72	51.73	28.43	231.442	46.9072	3.9941	21.5533	60.599	43.0679
2018	270	Gambia	80.2318	58.8986	103.653	2.79	52.91	27.68	237.118	47.0485	4.09984	22.5376	61.27	42.7653
2019	270	Gambia	43.8342	33.9952	54.5391	1.99	49.39	28.24	242.771	47.2014	4.30613	23.2186	61.931	42.4246
2020	270	Gambia	81.9337	57.5109	117.637	3.44	55.34	28.08	248.59	47.3646	4.51242	26.8559	62.582	42.0441
2021	270	Gambia	60.9709	47.4545	76.3491	3.74	59	27.69	254.546	47.5364	4.67473	25.3926	63.222	41.624
2022	270	Gambia	93.0642	72.4603	116.034	3.28	60.45	27.09	260.521	47.716	4.67473	28.8996	63.852	41.1844
2000	324	Guinea	433.738	324.448	567.718	3.66	71.48	24.4	34.3026	9.16231	1.44429	22.7172	30.869	44.8872
2001	324	Guinea	431.152	323.028	574.47	1.91	57.89	26.3	34.7548	9.88629	1.45786	21.7688	31.144	45.2693
2002	324	Guinea	414.674	295.598	565.455	1.65	49.86	27.75	35.3006	10.6114	1.47143	24.8392	31.42	45.4843
2003	324	Guinea	394.188	274.258	549.168	1.75	52.97	27.64	36.1012	11.3379	1.485	25.6019	31.698	45.3918
2004	324	Guinea	365.741	248.661	518.12	2.06	56.14	27.41	36.8823	12.2069	1.49857	26.4142	31.977	45.3232
2005	324	Guinea	343.954	229.812	493.537	2.21	58.72	27.05	37.6276	13.095	1.51214	19.6639	32.257	45.3106
2006	324	Guinea	337.932	228.171	480.482	1.86	54.2	27.22	38.4225	14.0026	1.52571	16.1597	32.539	45.2549
2007	324	Guinea	345.441	241.17	481.716	1.87	53.21	26.96	39.3223	14.9295	1.53929	22.6414	32.822	45.0956
2008	324	Guinea	369.369	275.287	483.472	4.43	63.62	25.59	40.2852	15.8756	1.55286	22.974	33.106	44.8936
2009	324	Guinea	399.49	313.755	503.39	5.82	70.04	25.15	41.2809	16.841	1.56643	23.7157	33.391	44.6866
2010	324	Guinea	420.643	337.633	518.742	5.01	74.62	24.92	42.3087	17.8259	1.58	22.5974	33.678	44.4793
2011	324	Guinea	433.675	352.831	525.304	3.02	69.74	25.12	43.3697	18.8301	1.6525	24.1281	33.966	44.2499
2012	324	Guinea	435.325	359.984	521.945	5.1	67.29	25.2	44.4473	19.8536	1.725	23.7001	34.255	44.0008
2013	324	Guinea	413.258	329.064	511.774	4.4	71.83	24.84	45.5473	20.8964	1.7975	25.9047	34.545	43.768
2014	324	Guinea	393.577	300.199	506.73	5.11	72.22	24.86	46.691	21.9585	1.87	36.6352	34.836	43.54
2015	324	Guinea	378.694	279.591	505.59	5.51	72.93	24.53	47.8881	23.043	2.45096	43.4154	35.141	43.2986
2016	324	Guinea	360.231	257.606	487.97	5.47	72.14	24.77	49.1333	24.1498	3.03192	38.4613	35.46	43.0673
2017	324	Guinea	357.593	249.783	493.522	4.28	70.6	25.3	50.4056	25.2793	2.58096	32.6365	35.793	42.8584
2018	324	Guinea	359.092	248.967	501.847	6.03	71.38	25.02	51.7043	26.4315	2.13	34.8898	36.14	42.646
2019	324	Guinea	343.692	231.172	495.913	5.4	70.72	25.2	53.0455	27.6064	2.24271	42.1691	36.5	42.406
2020	324	Guinea	334.458	204.344	520.692	6.08	73.97	24.65	54.4163	28.8045	2.36138	41.1028	36.875	42.1447
2021	324	Guinea	330.898	202.509	514.205	7.21	71.73	25.35	55.7973	30.0258	2.48634	44.1048	37.264	41.8697
2022	324	Guinea	315.297	194.343	496.609	5.19	72.07	24.81	57.1998	31.2707	2.48634	55.0379	37.668	41.5697
2000	430	Liberia	431.194	270.733	645.791	5.41	86.74	24.34	30.3999	12.0534	3.52503	8.48563	44.331	43.0432
2001	430	Liberia	440.003	278.512	659.001	3.87	85.56	24.66	31.3054	12.3539	3.59023	6.83266	44.673	42.9761
2002	430	Liberia	439.117	273.951	669.607	2.81	77.69	25.96	32.1302	12.6574	3.65543	6.94841	45.017	42.9311
2003	430	Liberia	434.036	273.274	654.96	3.43	79.92	25.9	32.3872	12.9635	3.72064	6.09226	45.361	42.9165
2004	430	Liberia	406.824	266.232	603.948	3.53	80.32	25.9	32.775	13.2725	3.78584	18.0093	45.706	42.9325
2005	430	Liberia	388.575	271.116	540.324	2.86	79.61	25.87	34.2713	13.5842	3.85104	20.4277	46.051	42.9816
2006	430	Liberia	376.278	276.629	498.48	3.08	79.57	25.92	36.2416	14.043	3.91421	19.2805	46.396	43.064
2007	430	Liberia	370.922	280.866	479.507	3.23	80.28	25.62	38.0923	14.5085	3.97737	15.8536	46.742	43.1572
2008	430	Liberia	370.852	288.051	467.875	5.98	83.31	25.2	39.6699	14.9805	4.04054	26.3008	47.088	43.1546
2009	430	Liberia	354.566	274.709	452.988	5.47	87.02	24.7	40.9368	15.4614	4.1037	51.7976	47.445	43.1136
2010	430	Liberia	337.023	257.939	434.929	6.92	88.09	25.04	42.1396	15.9512	4.16687	50.1537	47.813	43.0895
2011	430	Liberia	323.849	246.58	417.332	4.44	86.78	24.74	43.8245	16.4502	4.25652	53.8301	48.193	42.6782
2012	430	Liberia	306.719	226.448	405.933	5.06	84.99	24.76	45.4012	16.9579	4.34617	49.8809	48.583	42.3871
2013	430	Liberia	312.141	224.781	423.723	5.7	86	24.64	46.4103	17.4748	4.43583	48.2211	48.985	42.4767
2014	430	Liberia	333.308	244.664	447.938	8.11	88.43	24.64	47.3868	18.0005	4.52548	59.3239	49.397	42.4854
2015	430	Liberia	345.111	265.236	445.33	6.71	86.41	24.49	48.3745	18.5351	4.61514	69.4093	49.82	42.3992
2016	430	Liberia	376.952	305.206	461.396	4.76	83.58	25.23	49.373	19.0788	4.75573	67.6802	50.254	42.2665
2017	430	Liberia	404.325	324.255	501.05	5.05	85.24	25.34	50.3418	19.6309	5.02372	71.5661	50.697	42.1338
2018	430	Liberia	402.138	305.974	521.493	6.96	85.57	25.06	51.3364	20.1921	5.29172	71.1715	51.151	41.9566
2019	430	Liberia	392.021	277.407	539.653	6.67	86.15	25.21	52.3642	20.762	5.55971	51.1932	51.615	41.7171
2020	430	Liberia	376.226	230.419	578.73	6.31	85.74	25.07	53.462	21.3406	5.85686	76.1101	52.089	41.3768
2021	430	Liberia	356.688	216.342	569.474	6.74	87.87	25.14	54.6026	21.9279	6.16989	92.3296	52.573	40.956
2022	430	Liberia	349.462	206.822	548.979	7.34	86.31	24.86	55.7859	22.5234	6.16989	99.6505	53.065	40.4841
2000	516	Namibia	53.6088	21.2527	107.205	1.18	40.87	20.65	2.209	28.0552	5.791	200.107	32.373	41.5219
2001	516	Namibia	69.8342	37.628	124.459	0.77	36.07	21.21	2.25564	28.3499	5.8	185.653	32.898	41.2893
2002	516	Namibia	46.9608	22.0066	91.1308	0.63	31.13	21.41	2.29563	28.7898	5.88024	173.558	33.766	40.9603
2003	516	Namibia	44.4392	18.8085	90.9064	0.34	29.28	22.11	2.32903	29.2486	5.96048	257.138	34.709	40.5296
2004	516	Namibia	68.5285	33.1803	131.466	0.9	34.48	21.22	2.35893	29.6982	6.04072	347.417	35.666	40.0151
2005	516	Namibia	41.914	21.9634	76.1696	0.9	33.53	21.81	2.38869	30.1361	6.12097	374.682	36.632	39.3787
2006	516	Namibia	43.2361	25.6524	71.3743	1.57	44.01	19.67	2.41942	30.5633	6.17652	409.224	37.61	38.6827
2007	516	Namibia	12.9417	3.91951	29.8236	0.45	29.22	21.35	2.45187	30.9787	6.23207	463.444	38.598	38.0588
2008	516	Namibia	7.4742	1.01043	20.6817	0.94	35.41	21.2	2.48643	31.3826	6.28762	411.657	39.597	37.5291
2009	516	Namibia	3.69682	0.48556	11.1	0.91	36.84	21.19	2.52328	31.7723	6.34317	384.441	40.601	37.1094
2010	516	Namibia	1.55435	0.48191	3.6999	0.8	36.52	21.47	2.56266	32.1501	6.39872	519.551	41.616	36.8231
2011	516	Namibia	1.82684	1.25078	2.78046	1.41	43.82	19.83	2.60701	32.5137	6.516	565.435	42.637	36.6814
2012	516	Namibia	3.17653	1.29905	5.48994	1.1	34.44	20.76	2.66571	32.8736	6.63327	550.683	43.693	36.6391
2013	516	Namibia	4.48272	3.56089	5.49312	0.78	29.43	21.47	2.73598	33.2191	6.75055	484.643	44.756	36.6062
2014	516	Namibia	14.48	11.47	17.7451	1.41	40.64	20.28	2.80841	33.5499	6.86783	452.259	45.826	36.5482
2015	516	Namibia	8.30732	6.56548	10.1888	0.57	30.66	21.97	2.88392	33.865	6.9851	476.509	46.9	36.5084
2016	516	Namibia	17.3803	13.7764	21.2596	0.69	30.98	22.37	2.96276	34.1587	7.03654	409.781	47.961	36.5439
2017	516	Namibia	47.5025	37.6178	58.0772	0.92	37.22	21.44	3.04492	34.4301	7.08797	448.582	49.005	36.6666
2018	516	Namibia	26.2984	20.8388	32.2377	0.57	30.9	22.07	3.13052	34.6797	7.13941	439.877	50.032	36.8286
2019	516	Namibia	2.93766	2.08854	4.19873	0.47	25.27	22.91	3.21939	34.9608	7.19085	397.428	51.042	36.9757
2020	516	Namibia	10.2201	8.11802	12.5261	0.72	34.29	21.34	3.31446	35.26	7.24228	344.699	52.033	37.1395
2021	516	Namibia	10.6169	8.4205	12.9781	1.23	38.55	20.51	3.4138	35.5534	7.27315	413.512	53.005	37.3548
2022	516	Namibia	8.29029	6.5627	10.1445	1.06	37.8	21.51	3.5099	35.8405	7.27315	405.594	53.956	37.4729
2000	562	Niger	355.745	199.392	589.667	0.38	19.39	27.29	9.08631	5.5194	1.16088	9.10514	16.186	47.3202
2001	562	Niger	347.485	194.949	577.362	0.26	19.33	27.64	9.41079	6.0261	1.20309	9.74551	16.26	47.5318
2002	562	Niger	325.039	182.84	531.127	0.32	20.2	27.92	9.74907	6.51516	1.2453	10.9158	16.255	47.7587
2003	562	Niger	296.515	175.652	471.771	0.43	22.2	28.02	10.1026	7.00441	1.28752	12.6353	16.251	47.9964
2004	562	Niger	300.492	188.888	449.612	0.49	19.86	28.04	10.4728	7.49361	1.32973	14.157	16.247	48.241
2005	562	Niger	308.274	194.007	465.036	0.52	22.94	28.2	10.8599	7.9979	1.37194	18.0325	16.242	48.4806
2006	562	Niger	305.325	188.823	470.085	0.47	20.41	28.13	11.2644	8.49859	1.4036	19.3082	16.238	48.7072
2007	562	Niger	313.378	200.316	465.466	0.68	22.72	27.59	11.6868	8.99543	1.43526	20.8048	16.234	48.9177
2008	562	Niger	349.639	242.997	487.313	0.34	21.02	27.37	12.1275	9.48813	1.46692	24.7507	16.229	49.1045
2009	562	Niger	375.228	269.54	511.511	0.39	20.66	28.69	12.5868	9.97724	1.49858	24.511	16.225	49.2617
2010	562	Niger	407.621	289.606	563.4	0.52	23.05	28.56	13.0645	10.4625	1.53024	23.7641	16.221	49.3813
2011	562	Niger	421.399	294.715	580.759	0.35	21.36	28.1	13.5599	10.9436	1.58512	24.8412	16.216	49.4536
2012	562	Niger	425.165	290.018	602.151	0.55	23.74	27.77	14.0813	11.4211	1.64	22.7149	16.212	49.4503
2013	562	Niger	413.746	271.045	608.987	0.59	21.65	27.9	14.6206	11.8947	1.57432	24.6134	16.208	49.4002
2014	562	Niger	406.813	260.776	602.038	0.39	20.02	28.08	15.1701	12.3697	1.50864	25.0949	16.219	49.3247
2015	562	Niger	401.11	255.503	600.916	0.73	23.97	26.92	15.7413	12.8471	1.44296	25.9691	16.247	49.1923
2016	562	Niger	384.938	245.778	579.439	0.6	22.79	28.15	16.3304	13.327	1.37727	22.6847	16.29	49.0136
2017	562	Niger	362.654	230.737	545.246	0.62	22.13	27.56	16.9223	13.8106	1.31159	29.0963	16.35	48.8153
2018	562	Niger	343.727	216.87	519.873	0.66	23.85	27.75	17.5164	14.2978	1.24591	30.6136	16.425	48.5876
2019	562	Niger	325.529	201.797	501.601	0.77	24.09	27.63	18.1162	14.79	1.29363	31.8942	16.517	48.3223
2020	562	Niger	322.409	188.321	524.116	1.09	26.92	27.22	18.7239	15.2881	1.34135	35.7551	16.626	48.0192
2021	562	Niger	295.136	169.615	477.318	0.44	20.12	28.16	19.3433	15.8816	1.41229	35.3941	16.751	47.681
2022	562	Niger	294.711	171.304	473.296	0.64	24.09	27.05	19.9826	16.4097	1.41229	26.5068	16.894	47.3267
2000	706	Somalia	132.94	84.1765	200.76	0.84	56.78	27.85	14.0892	20.1733	1.9	8.89129	33.247	47.3562
2001	706	Somalia	142.482	90.7358	213.715	0.38	54.18	28.59	14.6627	20.7761	1.936	9.07389	33.617	47.4603
2002	706	Somalia	135.131	87.0877	200.365	0.65	55.07	28.65	15.2231	21.3785	1.972	9.25619	33.99	47.5686
2003	706	Somalia	133.425	90.446	189.32	1.03	57.09	28.3	15.7955	22.1314	2.008	9.50392	34.756	47.6938
2004	706	Somalia	121.68	87.2786	165.083	0.9	57	28.29	16.3882	22.8843	2.044	9.72367	35.531	47.8764
2005	706	Somalia	133.053	96.7903	178.166	0.65	56	28.35	16.9672	23.8652	2.08	9.85384	36.311	48.1779
2006	706	Somalia	120.377	88.983	159.504	1.16	58.23	28.32	17.4953	24.8631	2.116	10.1309	37.1	48.5765
2007	706	Somalia	100.893	74.8301	133.528	0.68	56.23	28.68	18.0486	24.5604	2.152	10.5047	34.404	48.8729
2008	706	Somalia	61.5665	44.8249	82.6219	1.16	58.57	27.65	18.5913	25.9005	2.188	10.7124	36.011	48.9158
2009	706	Somalia	38.7895	28.2032	52.2868	0.65	55.6	28.66	19.0665	27.2576	2.224	11.1054	37.645	48.824
2010	706	Somalia	41.0643	28.6712	56.8476	1.22	58.28	28.17	19.5456	28.6319	2.26	11.5383	39.31	48.6917
2011	706	Somalia	33.6626	23.3478	47.045	1.3	58.65	27.95	19.6844	30.0196	2.296	11.8263	41	48.3037
2012	706	Somalia	34.2556	23.8987	47.6632	1.14	59.84	27.72	19.8635	31.0043	2.332	12.1255	41.558	47.9103
2013	706	Somalia	41.1803	28.3414	57.5815	1.59	60.95	27.67	20.5145	32.001	2.368	12.8529	42.117	47.7869
2014	706	Somalia	49.614	33.7875	70.3632	1.35	59.54	27.9	21.2636	33.01	2.404	13.1165	42.679	47.7036
2015	706	Somalia	58.1292	36.9917	87.5689	1.69	59.84	28.14	22.0087	34.0313	2.44	14.0859	43.245	47.6216
2016	706	Somalia	58.0228	32.8353	94.8014	0.41	55.66	28.57	22.8723	35.0646	2.476	11.7202	43.816	47.5398
2017	706	Somalia	54.7799	30.725	90.4874	0.36	53.24	28.97	23.7776	36.1093	2.512	13.4629	44.391	47.4139
2018	706	Somalia	60.1523	37.7431	92.2597	0.38	54.19	28.84	24.6318	37.1651	2.548	12.7053	44.971	47.2616
2019	706	Somalia	60.3535	40.1755	88.5738	0.5	55.03	29.2	25.5539	38.2309	2.584	12.8722	45.554	47.1381
2020	706	Somalia	56.1073	36.7716	82.2882	1.08	59.37	28.47	26.5425	39.3066	2.62	12.4231	46.141	47.0326
2021	706	Somalia	65.2294	39.289	101.863	1.8	60.06	27.8	27.5312	40.3914	2.656	14.6338	46.731	46.9504
2022	706	Somalia	58.982	35.8632	92.6977	0.75	56.84	28.33	28.3768	40.5758	2.692	15.3464	47.324	46.8214
2000	108	Burundi	436.226	181.84	333.958	2.65	68.08	19.58	251.955	45.2147	1.99889	5.67927	8.246	48.2624
2001	108	Burundi	426.99	265.999	513.133	2.48	72.81	19.09	258.348	45.4236	2.05278	7.50816	8.461	47.7367
2002	108	Burundi	407.434	202.42	373.978	2.67	69.72	19.67	265.737	45.6344	2.10667	6.46999	8.682	47.2286
2003	108	Burundi	376.331	114.362	227.767	2.69	70.54	19.73	274.266	45.8473	2.16056	5.87317	8.908	46.7258
2004	108	Burundi	324.093	141.434	275.709	3.87	73.94	19.03	284.683	45.8686	2.21444	8.88248	9.139	46.1586
2005	108	Burundi	298.306	287.957	636.962	2.56	72.58	19.44	295.456	45.8871	2.26833	11.1312	9.375	45.7664
2006	108	Burundi	278.363	118.263	241.473	3.57	74.06	19.22	306.291	45.9024	2.32222	14.1051	9.617	45.562
2007	108	Burundi	237.547	125.055	254.743	4.15	77.68	18.75	317.83	45.9145	2.37611	15.2629	9.864	45.4412
2008	108	Burundi	202.693	198.694	430.551	3.94	77.85	18.45	331.216	45.9233	2.43	14.6703	10.118	45.2446
2009	108	Burundi	174.734	197.558	411.407	4.44	77.65	18.73	348.429	45.9285	2.36333	18.32	10.376	45.0388
2010	108	Burundi	169.125	232.329	439.16	3.28	76.26	19.02	365.126	45.9301	2.29667	24.4511	10.642	45.097
2011	108	Burundi	163.754	215.993	403.757	4.38	76.62	18.86	378.426	45.9277	2.23	23.168	10.915	45.3899
2012	108	Burundi	164.659	166.712	331.594	3.23	77.42	18.78	392.174	45.9213	2.16333	20.012	11.194	45.7182
2013	108	Burundi	171.894	115.964	237.939	3.01	76.41	18.82	406.516	45.9106	2.09667	20.2632	11.482	46.0605
2014	108	Burundi	180.614	116.612	225.784	3.39	77.19	19	420.552	45.8955	2.03	18.066	11.776	46.4061
2015	108	Burundi	199.353	169.21	310.666	3.17	75.66	19.33	430.202	45.8757	2.28667	17.6757	12.078	47.0439
2016	108	Burundi	232.143	150.041	424.277	3.04	76.36	19.11	437.673	45.851	2.54333	18.5947	12.388	47.7165
2017	108	Burundi	249.792	296.998	595.541	2.91	73.48	19.62	448.083	45.8212	2.8	19.168	12.706	47.9494
2018	108	Burundi	287.231	282.529	563.597	4.82	80.97	18.27	461.816	45.786	2.95511	18.6782	13.032	47.7614
2019	108	Burundi	290.889	138.37	286.634	4.7	80.05	18.89	477.233	45.7453	3.11882	22.2448	13.366	47.3474
2020	108	Burundi	298.683	119.107	248.162	7.06	81.68	18.53	491.318	45.7275	3.29159	26.2193	13.708	46.9567
2021	108	Burundi	284.007	204.707	394.806	5.57	81.19	18.46	504.886	45.7093	3.47394	23.2174	14.058	46.5191
2022	108	Burundi	261.402	167.749	451.337	4.28	80.46	18.34	518.734	45.6907	3.47394	24.6872	14.417	45.9889
2000	140	Central African Republic	424.438	325.872	573.86	2.89	61.9	25.94	6.15335	20.594	2.59313	9.91234	37.639	45.4527
2001	140	Central African Republic	425.442	308.849	554.482	2.55	60.15	26.52	6.29151	20.5473	2.66567	9.20995	37.72	45.4145
2002	140	Central African Republic	433.176	330.433	585.486	3.31	59.72	26.74	6.43051	20.5006	2.7382	10.4413	37.802	45.3257
2003	140	Central African Republic	438.454	324.275	571.788	3.38	64.41	26.29	6.58622	20.4536	2.81074	12.15	37.884	45.1761
2004	140	Central African Republic	442.386	315.077	563.41	2.72	57.06	27.09	6.73027	20.4063	2.88327	12.9681	37.966	45.1149
2005	140	Central African Republic	444.161	255.391	536.839	2.03	52.61	28.08	6.88435	19.9721	2.95581	13.9352	38.069	45.0534
2006	140	Central African Republic	444.529	196.577	514.992	2.01	51.91	27.97	7.02684	19.545	3.01202	15.155	38.193	45.1165
2007	140	Central African Republic	437.359	182.749	497.122	3.61	62.22	26.2	7.16358	19.1249	3.06824	18.2463	38.339	45.2594
2008	140	Central African Republic	427.613	181.418	505.7	3.59	66.62	25.49	7.31803	18.711	3.12445	18.0289	38.506	45.3532
2009	140	Central African Republic	418.692	199.883	526.102	4.42	68.46	25.53	7.26997	18.3031	3.18066	21.3777	38.694	45.6138
2010	140	Central African Republic	406.705	179.792	506.462	4.28	74.08	25.06	7.2121	17.901	3.23688	17.0101	38.904	45.9474
2011	140	Central African Republic	394.235	197.869	527.606	3.94	67.4	25.13	7.32772	17.504	3.35656	19.6299	39.135	46.3153
2012	140	Central African Republic	384.788	306.332	573.879	4.29	70.21	24.95	7.40128	17.1122	3.47625	21.3302	39.388	46.9201
2013	140	Central African Republic	377.014	309.346	567.724	4.35	76.42	24.54	7.45196	16.725	3.59593	17.3679	39.663	47.5892
2014	140	Central African Republic	367.209	331.527	584.004	4.17	74.75	24.55	7.42108	16.3421	3.71561	18.712	39.959	48.454
2015	140	Central African Republic	351.024	295.214	543.93	3.91	71.76	24.96	7.43093	15.9632	3.83529	18.4419	40.277	49.0066
2016	140	Central African Republic	335.114	282.961	532.294	4.72	72.59	25.12	7.56632	15.5882	3.85887	21.078	40.618	48.9993
2017	140	Central African Republic	333.029	269.318	538.161	4.92	74.98	24.75	7.69449	15.2165	3.88244	28.8162	40.98	49.0251
2018	140	Central African Republic	329.563	236.745	535.945	4.81	77.65	24.13	7.83116	14.8478	3.90602	51.3541	41.364	49.0475
2019	140	Central African Republic	324.178	218.632	535.438	4.32	75.73	24.74	7.93718	14.482	3.92959	35.761	41.77	49.0201
2020	140	Central African Republic	311.989	331.732	578.56	5.27	73.93	24.59	8.06868	14.1186	3.95316	42.6348	42.198	48.9114
2021	140	Central African Republic	310.88	193.598	511.797	4.96	76.09	24.49	8.20588	13.7575	3.98943	46.2464	42.648	49.0033
2022	140	Central African Republic	310.59	322.75	579.492	4.61	75.4	24.33	8.18331	13.8463	3.98943	47.9152	43.12	49.2152
2000	678	Sao Tome and Principe	222.49	34.7054	34.7054	3.2	83.93	25.89	150.019	20.6225	4.63458	49.6359	53.424	42.7931
2001	678	Sao Tome and Principe	287.752	17.2726	17.2726	2.76	84.21	25.64	152.474	21.7581	4.69181	47.1475	54.377	42.4574
2002	678	Sao Tome and Principe	337.598	13.8968	13.8968	3.6	84.46	26.17	156.169	22.9281	4.74975	50.6114	55.555	42.3325
2003	678	Sao Tome and Principe	277.416	12.7307	12.7307	3.33	84.08	26.41	160.223	24.1057	4.80841	71.2099	56.766	42.2026
2004	678	Sao Tome and Principe	294.781	8.84098	8.84098	2.82	83.88	26.22	164.276	25.2854	4.86779	71.0559	57.972	42.1039
2005	678	Sao Tome and Principe	112.191	12.187	12.187	2.78	84.38	26.09	168.374	26.5791	4.9279	80.1307	59.165	42.0337
2006	678	Sao Tome and Principe	31.0514	112.191	112.191	3.07	84.32	26.07	172.54	27.8809	4.98876	57.204	60.348	41.9964
2007	678	Sao Tome and Principe	14.2542	10.2226	10.2226	3.83	83.76	26.33	176.771	29.1901	5.05036	59.7163	61.52	42.0098
2008	678	Sao Tome and Principe	35.9647	10.7626	10.7626	3.3	83.87	26.16	181.034	30.5058	5.11273	64.5883	62.68	42.0552
2009	678	Sao Tome and Principe	34.7054	222.49	222.49	3.64	84.02	26.16	185.264	31.8268	5.17587	64.9055	63.823	42.0841
2010	678	Sao Tome and Principe	17.2726	337.598	337.598	3.08	84.15	26.13	189.377	33.1528	5.23979	60.9483	64.952	42.0545
2011	678	Sao Tome and Principe	45.3764	277.416	277.416	3.2	83.75	25.94	193.384	34.4829	5.30449	69.4598	66.064	41.9726
2012	678	Sao Tome and Principe	66.0791	287.752	287.752	3.35	83.57	26.18	197.332	35.8167	5.37	86.2904	67.16	41.9758
2013	678	Sao Tome and Principe	47.7041	66.0791	66.0791	3.19	83.2	25.95	201.196	37.1494	5.43797	124.592	68.208	42.0422
2014	678	Sao Tome and Principe	8.88115	8.88115	8.88115	3.66	84.05	25.91	204.966	38.4812	5.50595	118.71	69.213	42.0319
2015	678	Sao Tome and Principe	10.2226	17.4598	17.4598	3.29	84.82	25.8	208.636	39.8118	5.57392	85.3783	70.174	41.9203
2016	678	Sao Tome and Principe	10.9367	31.0514	31.0514	3.5	83.75	26.56	212.176	41.141	5.64189	109.731	71.092	41.6909
2017	678	Sao Tome and Principe	10.7626	294.781	294.781	3.42	84.39	26.13	215.594	42.4688	5.70986	117.078	71.968	41.3578
2018	678	Sao Tome and Principe	13.8968	14.2542	14.2542	3.61	83.62	26.32	218.945	43.7952	5.77784	108.876	72.803	40.9492
2019	678	Sao Tome and Principe	12.7307	35.9647	35.9647	3.26	83.77	26.55	222.283	45.1201	5.84581	106.869	73.598	40.4732
2020	678	Sao Tome and Principe	8.84098	47.7041	47.7041	2.87	82.58	26.61	226.495	46.4436	5.91626	159.844	74.354	39.9346
2021	678	Sao Tome and Principe	12.187	10.9367	10.9367	3.38	82.95	26.64	231.209	47.7658	5.98756	187.065	75.073	39.3526
2022	678	Sao Tome and Principe	17.4598	45.3764	45.3764	3.02	83.07	26.27	235.734	47.8426	5.98756	180.334	75.755	38.7866
2000	768	Togo	444.41	338.279	574.218	3.01	71.01	25.53	94.5033	9.60294	3.08427	10.6364	32.907	42.6284
2001	768	Togo	440.802	328.003	582.349	2.82	70.13	25.95	97.0285	9.88565	3.12302	10.635	33.356	42.4484
2002	768	Togo	446.366	329.431	591.099	3.58	70.85	25.84	99.527	10.1704	3.16176	12.0103	33.809	42.3092
2003	768	Togo	454.326	349.81	583.977	4.48	74.76	25.63	102.081	10.4571	3.20051	14.7066	34.265	42.1782
2004	768	Togo	459.408	359.91	576.047	3.78	77.69	25.23	104.734	10.7456	3.23926	16.092	34.724	42.0356
2005	768	Togo	458.505	361.376	573.377	3.18	76.93	25.42	107.458	11.1773	3.278	16.9577	35.185	41.9136
2006	768	Togo	454.842	354.216	570.918	3.37	74.23	25.77	110.511	11.6196	3.2935	17.7501	35.649	41.7681
2007	768	Togo	436.129	335.661	556.269	4.18	76.08	25.17	113.777	12.0722	3.309	22.3431	36.116	41.642
2008	768	Togo	390.75	292.674	514.713	3.64	75.48	25	117.095	12.5355	3.3245	26.8938	36.587	41.5706
2009	768	Togo	340.325	251.053	449.079	4.19	78.49	25.38	120.461	13.0083	3.34	28.3036	37.058	41.5445
2010	768	Togo	315.813	238.181	406.826	4.07	78.09	25.51	123.784	13.4914	3.49	30.546	37.533	41.5827
2011	768	Togo	307.935	236.162	394.913	3.73	78.16	25.02	127.164	13.9893	3.64	34.4114	38.032	41.6208
2012	768	Togo	334.304	265.582	415.68	3.93	77.48	25.03	130.552	14.4999	3.8431	35.4029	38.546	41.6307
2013	768	Togo	366.278	298.842	444.912	3.2	75.54	25.61	133.948	15.0199	4.04619	39.5641	39.061	41.6038
2014	768	Togo	364.65	298.176	441.933	3.73	74.42	26	137.386	15.5497	4.24929	41.9642	39.579	41.5431
2015	768	Togo	351.232	285.289	427.607	3.17	71.66	25.83	140.893	16.0892	4.45239	46.6977	40.1	41.4587
2016	768	Togo	316.988	254.247	391.658	4.21	72.64	25.98	144.48	16.6392	4.65548	50.649	40.628	41.3558
2017	768	Togo	272.994	213.663	344.29	3.83	75.23	25.68	148.136	17.1993	4.85858	51.5465	41.162	41.2322
2018	768	Togo	246.556	185.583	318.902	4.28	76.94	25.16	151.844	17.7695	5.09187	52.4361	41.702	41.0869
2019	768	Togo	232.586	169.927	313.607	4.2	77.77	25.48	155.6	18.3495	5.33636	48.8539	42.248	40.9267
2020	768	Togo	236.219	167.399	328.105	4.43	77.28	25.21	159.399	18.9394	5.59258	52.7521	42.8	40.7386
2021	768	Togo	231.829	147.823	349.453	4	77.34	25.58	163.236	19.0679	5.86111	52.7224	43.358	40.5052
2022	768	Togo	230.847	147.632	343.742	5.06	77.44	25.01	167.121	19.1976	5.86111	54.011	43.921	40.217
2000	384	Cote d'Ivoire	504.401	404.253	617.408	3.6	76.18	25.54	55.6572	20.6835	3.13997	33.5817	43.155	46.0381
2001	384	Cote d'Ivoire	514.476	415.045	628.827	3.12	73	26.03	57.1664	21.2855	3.23465	33.9455	43.568	46.1035
2002	384	Cote d'Ivoire	516.262	415.4	636.293	2.74	65.81	27.23	58.6628	21.888	3.32933	36.0672	43.983	46.1678
2003	384	Cote d'Ivoire	517.483	416.271	635.758	3.36	71.22	26.85	60.1432	22.4906	3.42401	43.8123	44.399	46.2321
2004	384	Cote d'Ivoire	510.388	408.992	629.401	3.22	72.48	26.75	61.6195	23.0936	3.5187	47.047	44.817	46.2897
2005	384	Cote d'Ivoire	485.963	390.769	599.703	3.22	72.45	26.72	63.1084	23.8185	3.61338	46.6944	45.234	46.3287
2006	384	Cote d'Ivoire	450.987	363.307	551.391	3.18	71.6	26.64	64.6126	24.5514	3.70613	47.089	45.652	46.35
2007	384	Cote d'Ivoire	421.511	344.738	512.583	2.97	69.47	26.63	66.1338	25.2924	3.79888	56.1508	46.071	46.353
2008	384	Cote d'Ivoire	422.168	344.656	512.936	3.44	69.5	26.42	67.6555	26.0412	3.89163	64.6768	46.491	45.8263
2009	384	Cote d'Ivoire	444.169	365.02	534.611	3.77	74.97	26.2	69.1759	26.7971	3.98438	71.0648	46.91	44.8524
2010	384	Cote d'Ivoire	466.272	386.141	559.644	4.35	77.36	26.21	70.7172	27.5606	4.07713	70.0461	47.33	44.002
2011	384	Cote d'Ivoire	463.386	381.388	557.255	3.52	79.35	25.49	72.2704	28.3316	4.22784	67.9762	47.751	43.2828
2012	384	Cote d'Ivoire	375.894	297.113	471.064	3.74	74.86	25.91	73.7958	29.1097	4.37856	69.862	48.172	42.6795
2013	384	Cote d'Ivoire	288.178	213.325	380.251	3.5	73.94	26.24	75.2823	29.8946	4.52928	67.1315	48.593	42.1525
2014	384	Cote d'Ivoire	257.757	183.721	351.44	4.8	78.32	25.99	77.1302	30.6864	4.68	74.3582	49.014	42.0261
2015	384	Cote d'Ivoire	239.924	158.518	346.088	3.65	76.97	25.5	79.391	31.4875	4.70714	58.4318	49.444	42.2235
2016	384	Cote d'Ivoire	242.267	150.696	365.636	4.19	72.36	26.35	81.7277	32.2973	4.73429	61.8571	49.881	42.348
2017	384	Cote d'Ivoire	251.845	153.612	393.267	3.69	76.18	26.21	84.0672	33.1157	4.76143	63.7794	50.326	42.4069
2018	384	Cote d'Ivoire	264.82	161.682	409.436	4.21	76.08	25.96	86.3653	33.9428	4.78857	65.8795	50.779	42.3825
2019	384	Cote d'Ivoire	269.304	162.351	419.453	4.65	76.3	26.17	88.6573	34.778	4.81571	68.3047	51.239	42.2979
2020	384	Cote d'Ivoire	269.855	162.417	426.737	4.17	77.81	25.73	90.9291	35.6211	4.84286	78.9777	51.706	42.1806
2021	384	Cote d'Ivoire	265.989	164.181	412.149	4.74	78.81	26.13	93.2067	36.291	4.87	92.3959	52.18	41.9799
2022	384	Cote d'Ivoire	260.752	162.291	402.012	4.59	77.84	25.6	95.5818	36.9621	4.87	86.1521	52.661	41.6627
2000	624	Guinea-Bissau	404.757	261.908	598.195	2.91	67.54	26.4	43.9097	4.16113	1.6832	13.2786	36.243	44.6504
2001	624	Guinea-Bissau	323.632	188.43	517.756	1.71	61.23	27.58	44.8532	4.64521	1.739	14.8228	36.622	44.4779
2002	624	Guinea-Bissau	252.285	138.798	423.897	1.57	54.11	28.53	45.8502	5.13883	1.983	14.3692	37.004	44.3141
2003	624	Guinea-Bissau	182.655	95.2926	323.041	3.05	60.65	27.8	46.8992	5.64179	2.093	14.8316	37.387	44.1614
2004	624	Guinea-Bissau	121.317	53.0169	238.811	3.14	64.22	27.23	47.993	6.54982	2.129	18.4515	37.772	44.0042
2005	624	Guinea-Bissau	93.2281	39.8374	186.206	4.37	68.12	27.09	49.1318	7.66562	2.14857	21.0774	38.157	43.8647
2006	624	Guinea-Bissau	78.0912	41.9378	133.869	3.57	68.24	26.42	50.3308	8.79676	2.27117	22.7886	38.545	43.7515
2007	624	Guinea-Bissau	76.7931	52.6107	108.281	3.11	64.24	26.77	51.5998	9.94309	2.41859	26.1581	38.934	43.6342
2008	624	Guinea-Bissau	87.9819	64.5407	117.704	5.35	66.61	27.05	52.918	11.105	2.56601	34.9468	39.325	43.4994
2009	624	Guinea-Bissau	107.268	74.8831	148.337	5.5	69.59	26.23	54.2808	12.2824	2.71343	27.6099	39.716	43.3438
2010	624	Guinea-Bissau	125.741	76.5029	194.892	5.16	71.68	26.82	55.7022	13.4761	2.86085	31.6125	40.111	43.1778
2011	624	Guinea-Bissau	129.374	74.2522	209.806	3.86	67.53	26.53	57.1862	14.686	3.00828	44.7291	40.508	43.0147
2012	624	Guinea-Bissau	125.365	67.3404	212.329	5.62	67.72	26.59	58.7275	15.9126	3.1557	37.755	40.908	42.8493
2013	624	Guinea-Bissau	119.613	53.5335	231.835	4.86	70.11	26.54	60.312	17.1558	3.30312	46.0593	41.31	42.6728
2014	624	Guinea-Bissau	104.545	43.9704	212.275	5.18	69.96	26.35	61.9176	18.4161	3.45054	64.9999	41.715	42.4752
2015	624	Guinea-Bissau	88.6871	37.3094	184.271	4.63	69.61	26.4	63.5298	19.6938	3.49504	52.4587	42.123	42.2439
2016	624	Guinea-Bissau	73.9058	28.5876	154.73	4.68	68.03	26.83	65.1456	20.9889	3.53954	56.6081	42.533	41.9792
2017	624	Guinea-Bissau	63.874	23.9205	139.412	4.72	67.04	27.14	66.7522	22.3016	3.58404	54.8225	42.945	41.6673
2018	624	Guinea-Bissau	64.3989	25.1182	138.485	4.53	67.33	26.59	68.3559	23.6323	3.62854	58.8793	43.36	41.3089
2019	624	Guinea-Bissau	71.9447	26.6075	155.811	3.91	65.09	26.91	69.975	24.9811	3.67304	54.1664	43.777	40.9289
2020	624	Guinea-Bissau	90.4899	36.0322	188.574	6.56	67.65	27.41	71.5951	26.3482	3.67304	68.1931	44.196	40.5415
2021	624	Guinea-Bissau	102.307	42.8328	205.712	4.8	69.25	27.1	73.2163	27.7339	3.67304	68.3788	44.617	40.142
2022	624	Guinea-Bissau	106.955	46.0857	215.835	6.79	70.17	26.72	74.8766	27.8438	3.67304	66.0548	45.041	39.7047
